# Supplementary material for: p -TSA catalyzed 6- endo-trig / dig cyclization of 5-aminopyrazoles and 3°/2°-propargylic alcohols: access to pyrazolo[1,5- a ]dihydropyrimidines and pyrazolo[3,4- b ]pyridines
Source: Royal Society of Chemistry journal article supplement (doi:10.1039/d4ob01255k), 2024-01-01

**Supporting Information for**

***p*-TSA Catalyzed 6-Endo-Trig/Dig Cyclization of 5-Aminopyrazoles and 3<sup>0</sup>/2<sup>0</sup>-Propargylic alcohols: Access to Pyrazolo[1,5-*a*]dihydropyrimidines & Pyrazolo[3,4-*b*]pyridines**

Nagaraju Medishetti,<sup>a, b</sup> Bhanu Prasad Banda,<sup>a, b</sup> and Krishnaiah Atmakur<sup>\*a, b</sup>

<sup>a</sup>*Fluoro & Agrochemicals Department, CSIR-Indian Institute of Chemical Technology, Tarnaka, Hyderabad, 500007, India.*

<sup>b</sup>*Academy of Scientific and Innovative Research (AcSIR), Ghaziabad 201002, India.*

***Contents***

|        |                                                                                                                        |      |
|--------|------------------------------------------------------------------------------------------------------------------------|------|
| 1.1.   | Structures of starting materials                                                                                       | 1    |
| 1.2.   | Experimental Section                                                                                                   | 1    |
| 1.2.1. | General procedure for the synthesis of compounds <b>3a-3l</b> and <b>3m-3t</b>                                         | 2    |
| 1.2.2. | General procedure for the synthesis of compounds <b>7a-7i</b>                                                          | 2    |
| 1.3.   | Spectroscopic data and copies <sup>1</sup> H & <sup>13</sup> C of compounds <b>3a-3t</b> , <b>6a-6b</b> & <b>7a-7i</b> | 3-36 |

## 1.1. Structures of starting materials

### 1.1.1. Structures of Aminopyrazoles (1a-i)

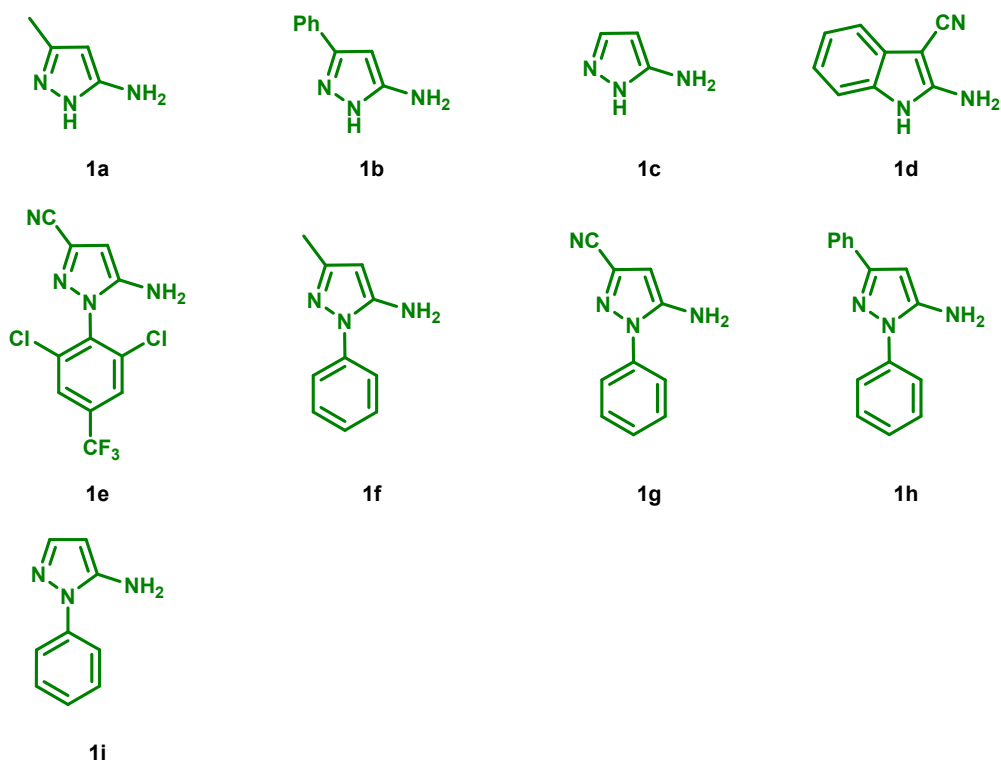

### 1.1.2. Structures of 3°/2°-Propargylic alcohols (2a-k)

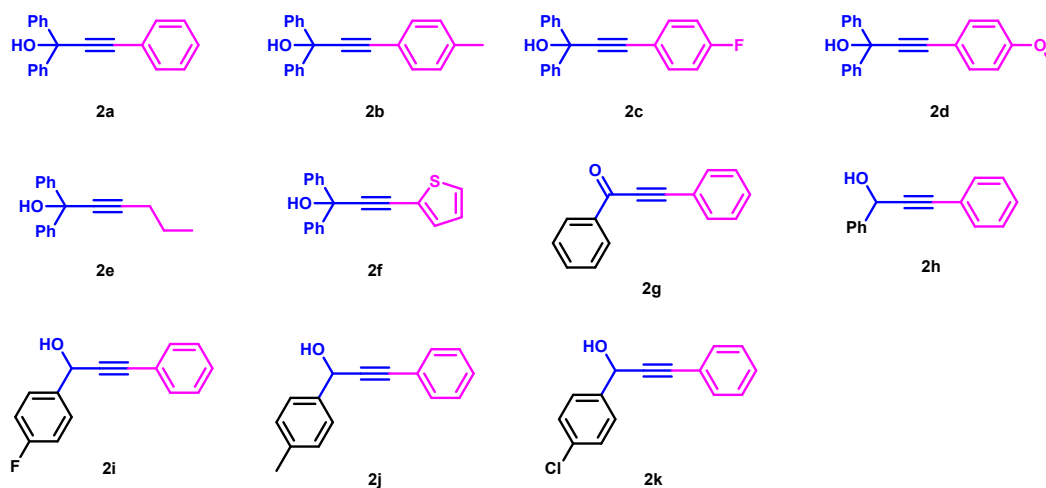

## 1.2. Experimental section

### General

Melting points were measured by CINTEX programmable melting point apparatus and are uncorrected.  $^1\text{H}$  and  $^{13}\text{C}$  NMR spectra of samples in  $\text{CDCl}_3$  recorded on AVANCE- 300, 400,

500 MHz spectrometers. Chemical shifts ( $\delta$ ) are reported relative to TMS ( $\delta = 0.0$ ) as the internal standard. Mass spectra were recorded in ESI spectrometers. All high-resolution mass spectra were recorded on QSTAR XL hybrid ms/ms system (Applied Bio systems/MDS sciex, foster city, USA), equipped with an ESI source (IICT, Hyderabad). TLC was performed on Merck 60 F-254 silica gel plates. The chemicals used in this work were obtained from commercial channels and were used without purification.

### **1.2.1. General Procedure for the Synthesis of dihydropyrazolo[1,5-*a*]pyrimidines (3a-3l) and pyrazolo[1,5-*a*]pyrimidines (3m-3t).**

A mixture of *NH*-5-aminopyrazoles (**1a-d**, 82 mg, 1.2 mmol, 1.2 equiv.), substituted tert-propargylic alcohols (**2a-f**, 200 mg, 1 mmol, 1.0 equiv.)/1,3-diphenyl-2-yn-1-one (**2g**, 200 mg, 1 mmol, 1.0 equiv.), and *p*-TSA (40 mg, 0.3 mmol, 0.3 equiv.) in acetonitrile (15 mL) was stirred at reflux temperature for 3 h. After completion of the reaction ascertained by TLC, acetonitrile was evaporated under reduced pressure and the crude mass was purified by column chromatography (silica gel 60-120 mesh, hexane/EtOAc 7:3 as eluent) to afford the isolated yield of **3a** is 86% (215 mg). Similar procedure was adopted for all the corresponding products **3a-3t**.

### **1.2.2. General Procedure for the Synthesis pyrazolo[3,4-*b*]pyridines (7a-7i).**

A mixture of *N*-aryl-5-aminopyrazoles (**1e-i**, 370 mg, 1.2 mmol, 1.2 equiv.), sec-propargylic alcohols (**2h-k**, 200 mg, 1.0 mmol, 1.0 equiv.) and sequential addition of *p*-TSA (54 mg, 0.3 mmol, 0.3 equiv.) and K<sub>2</sub>CO<sub>3</sub> (66 mg, 0.5 mmol, 0.5 equiv.) in acetonitrile (15 mL) was heated to reflux for 4 h. After completion of the reaction indicated by TLC, acetonitrile was evaporated under reduced pressure and worked up with water (20 mL) and ethyl acetate (30 mL). Further, separated organic layer dried over anhydrous sodium sulphate evaporated under reduced pressure, crude product was purified by column chromatography, (silica gel 60-120 mesh, hexane/EtOAc 9:1 as eluent) to afford the isolated yield of **7a** is 93% (455 mg) and similar procedure was followed for all the corresponding products **7a-7i**.

### 1.3 Spectroscopic data and copies $^1\text{H}$ & $^{13}\text{C}$ of compounds.

#### 2-methyl-5,7,7-triphenyl-6,7-dihydropyrazolo[1,5-*a*]pyrimidine (3a)

Isolated as a yellow solid, yield 80% (215 mg), m.p 175-177 °C, IR (ATR): 3132, 3022, 2244, 1718, 1597, 1488, 1385, 1272, 1050, 843, 754  $\text{cm}^{-1}$ ,  $^1\text{H}$  NMR (400 MHz,  $\text{CDCl}_3$ ):  $\delta$  7.93 (dd,  $J = 7.9, 1.7$  Hz, 2H), 7.44 (dd,  $J = 7.9, 6.0$  Hz, 3H), 7.29-7.24 (m, 6H), 7.15-7.12 (m, 4H), 6.31 (s, 1H), 3.78 (s, 2H), 2.31 (s, 3H) ppm,  $^{13}\text{C}$  NMR (125 MHz,  $\text{CDCl}_3$ ):  $\delta$  162.80, 149.02, 147.45, 141.67, 137.25, 131.15, 128.76, 128.42, 127.94, 127.81, 126.91, 103.88, 67.52, 42.00, 14.52 ppm, ESI-MS:  $m/z$  364  $[\text{M}+\text{H}]^+$ , HRMS (ESI) Anal. calcd. for  $\text{C}_{25}\text{H}_{22}\text{N}_3$   $m/z$  364.1808  $[\text{M}+\text{H}]^+$ , found 364.1800.

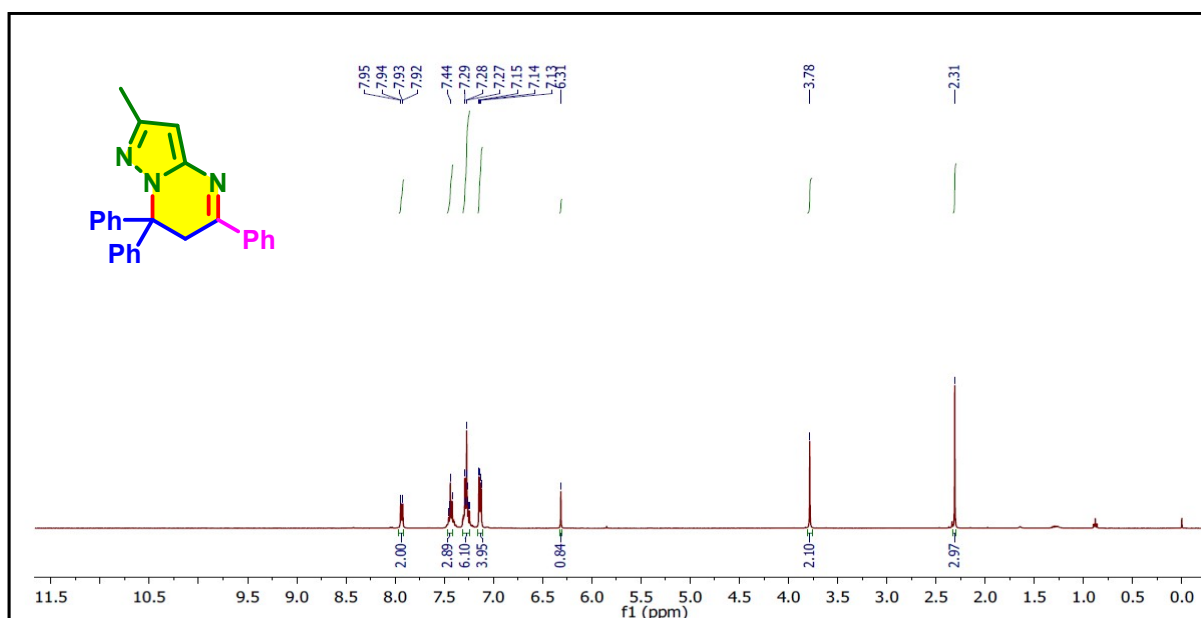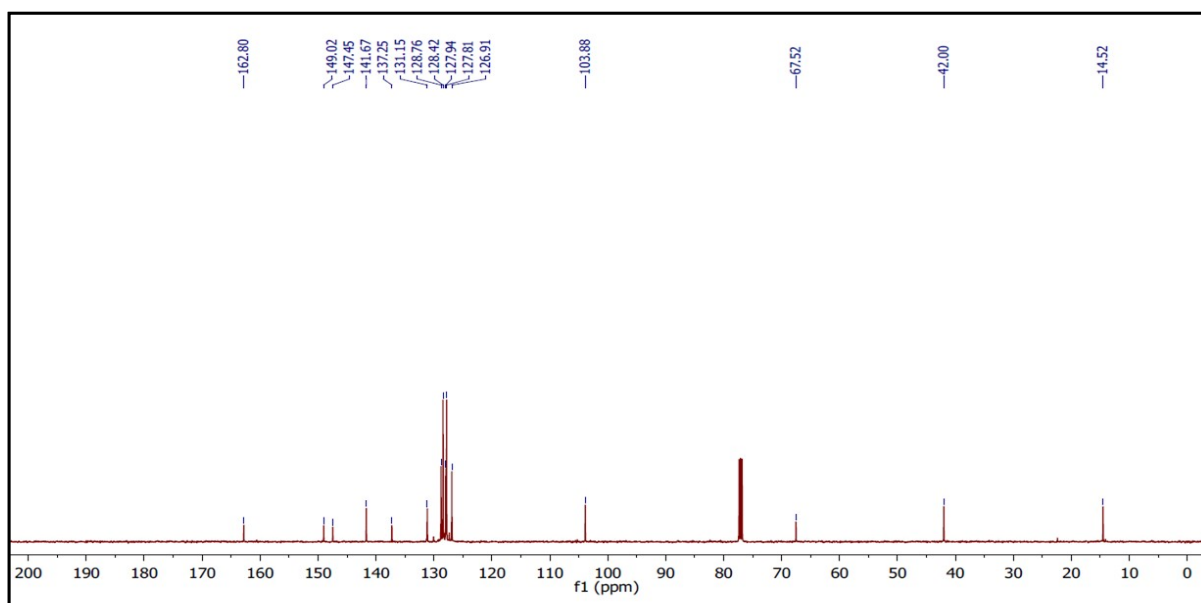

## 2-methyl-7,7-diphenyl-5-(*p*-tolyl)-6,7-dihydropyrazolo[1,5-*a*]pyrimidine (3b)

Isolated as a light yellow solid, yield 83% (210 mg), m.p 154-156 °C, IR (ATR): 3060, 3023, 2361, 1557, 1397, 1306, 1175, 1094, 932, 753 cm<sup>-1</sup>, <sup>1</sup>H NMR (400 MHz, CDCl<sub>3</sub>) δ 7.84 (d, *J* = 8.2 Hz, 2H), 7.30 – 7.21 (m, 8H), 7.13 (dd, *J* = 7.8, 1.6 Hz, 4H), 6.29 (s, 1H), 3.76 (s, 2H), 2.39 (s, 3H), 2.30 (s, 3H) ppm, <sup>13</sup>C NMR (100 MHz, CDCl<sub>3</sub>) δ 162.74, 148.96, 147.55, 141.75, 141.70, 134.49, 129.51, 128.40, 127.90, 127.83, 126.93, 103.58, 67.48, 41.90, 21.54, 14.52 ppm, ESI-MS: *m/z* 378 [M+H]<sup>+</sup>, HRMS (ESI) Anal. calcd. for C<sub>26</sub>H<sub>24</sub>N<sub>3</sub> *m/z* 378.1964 [M+H]<sup>+</sup>, found 378.1957.

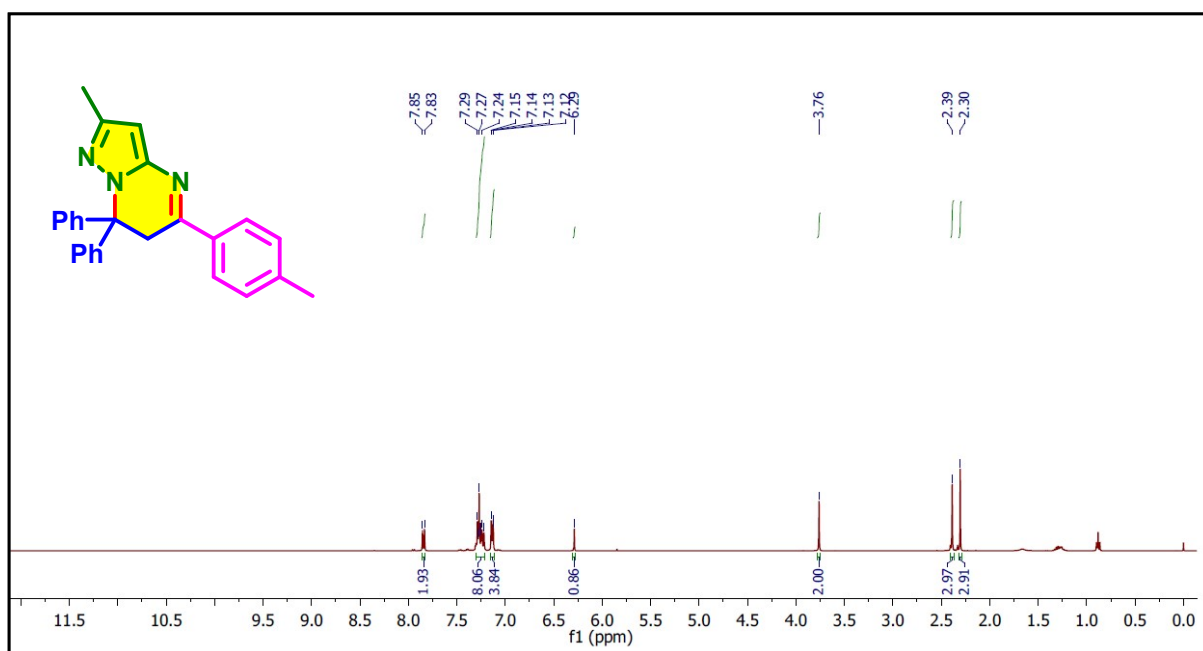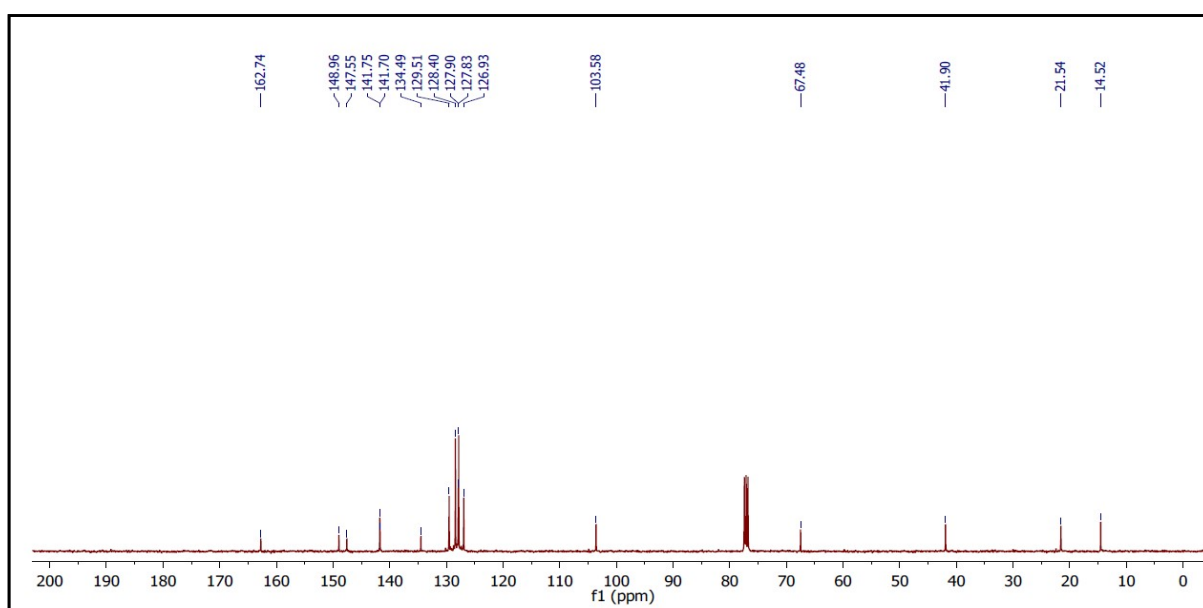

### 5-(4-fluorophenyl)-2-methyl-7,7-diphenyl-6,7-dihydropyrazolo[1,5-a]pyrimidine (3c)

Isolated as a red solid, yield 78% (197 mg), m.p 105-107 °C, IR (ATR): 3203, 2925, 2384, 2309, 1721, 1608, 1448, 1214, 1036, 909, 759  $\text{cm}^{-1}$ ,  $^1\text{H}$  NMR (400 MHz,  $\text{CDCl}_3$ )  $\delta$  7.96 – 7.91 (m, 2H), 7.32 – 7.26 (m, 6H), 7.14 – 7.06 (m, 6H), 6.30 (s, 1H), 3.75 (s, 2H), 2.30 (s, 3H) ppm,  $^{13}\text{C}$  NMR (100 MHz,  $\text{CDCl}_3$ )  $\delta$  164.58 (d,  $J= 252.72$  Hz), 161.57, 149.07, 147.33, 141.52, 133.48, 129.08 (d,  $J= 8.8$  Hz), 128.44, 128.00, 127.77, 115.86 (d,  $J= 22.0$  Hz), 103.85, 67.48, 41.94, 14.48 ppm, ESI-MS:  $m/z$  382  $[\text{M}+\text{H}]^+$ , HRMS (ESI) Anal. calcd. for  $\text{C}_{25}\text{H}_{21}\text{FN}_3$   $m/z$  382.1714  $[\text{M}+\text{H}]^+$ , found 382.1705.

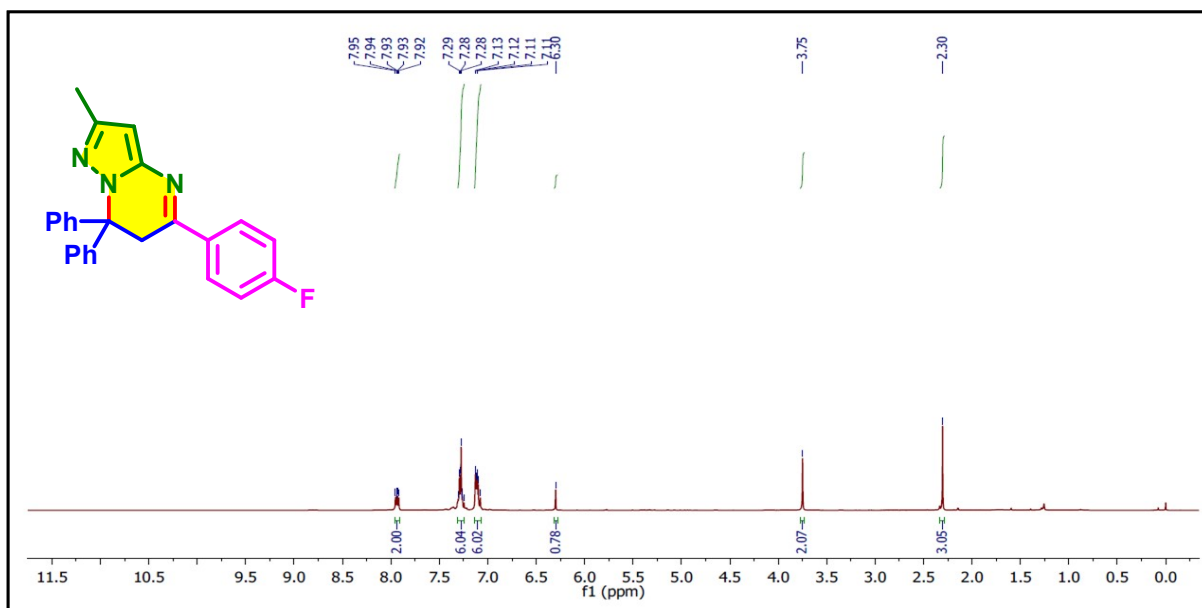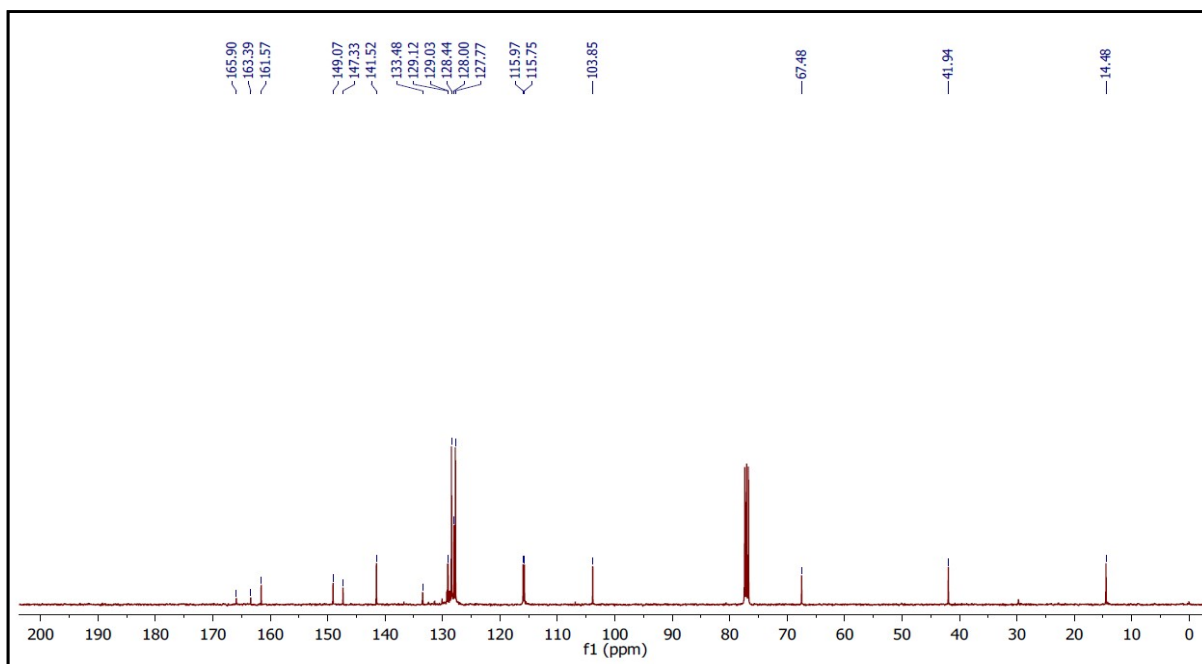

### 5-(4-methoxyphenyl)-2-methyl-7,7-diphenyl-6,7-dihydropyrazolo[1,5-a]pyrimidine (3d)

Isolated as a red solid, yield 85% (212 mg), m.p 175-177 °C, IR (ATR): 3050, 3018, 1707, 1640, 1554, 1448, 1214, 1073, 890, 745  $\text{cm}^{-1}$ ,  $^1\text{H}$  NMR (500 MHz,  $\text{CDCl}_3$ )  $\delta$  7.91 (d,  $J = 8.9$  Hz, 2H), 7.30 – 7.24 (m, 6H), 7.13 (m, 4H), 6.92 (d,  $J = 8.9$  Hz, 2H), 6.26 (s, 1H), 3.84 (s, 3H), 3.74 (s, 2H), 2.30 (s, 3H) ppm,  $^{13}\text{C}$  NMR (125 MHz,  $\text{CDCl}_3$ ):  $\delta$  162.21, 162.16, 148.93, 147.64, 141.76, 129.81, 129.29, 128.73, 128.39, 127.88, 127.82, 114.11, 103.20, 67.42, 55.45, 41.78, 14.50 ppm, ESI-MS:  $m/z$  394  $[\text{M}+\text{H}]^+$ , HRMS (ESI) Anal. calcd. for  $\text{C}_{26}\text{H}_{24}\text{N}_3\text{O}$   $m/z$  394.1913  $[\text{M}+\text{H}]^+$ , found 394.1906.

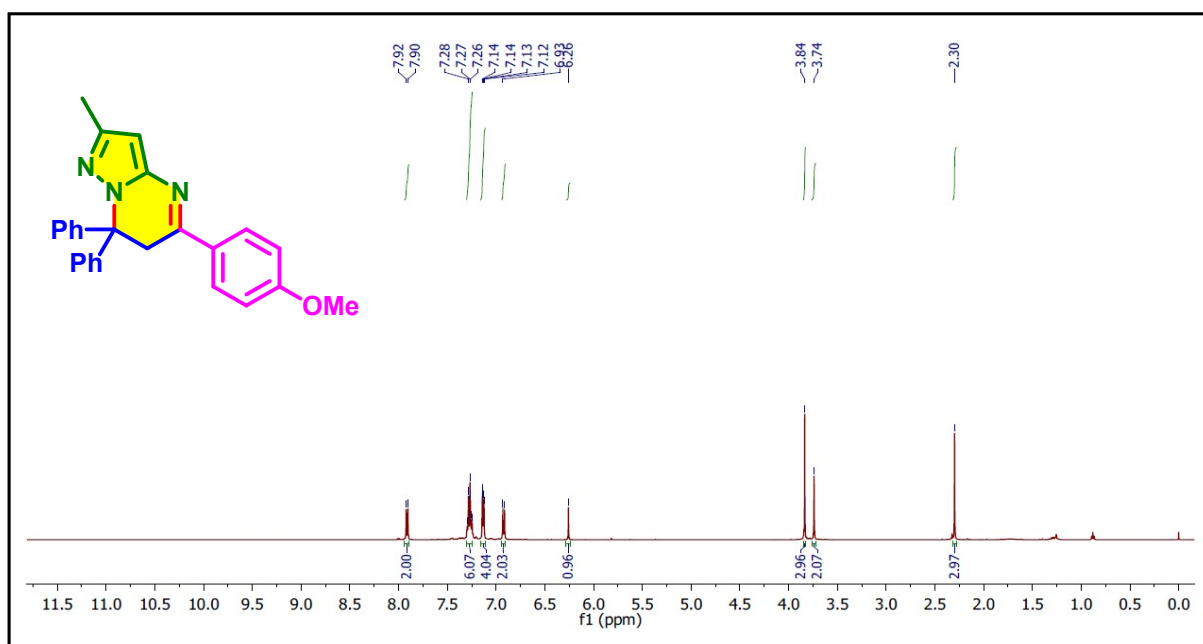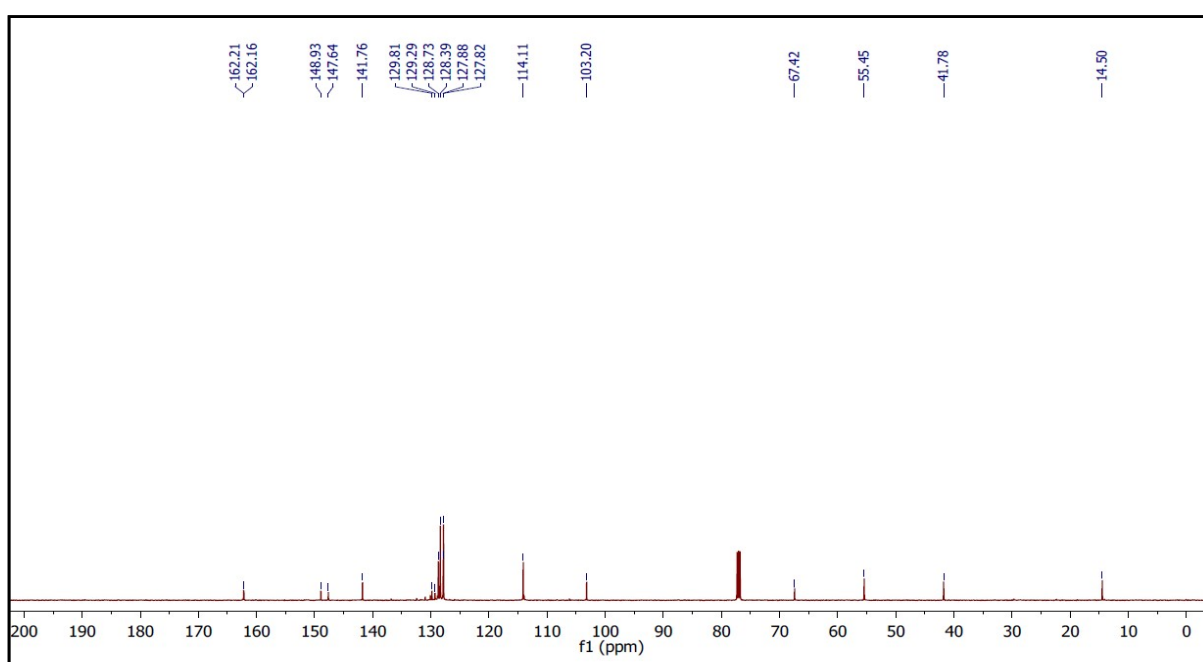

## 2-methyl-7,7-diphenyl-5-propyl-6,7-dihydropyrazolo[1,5-a]pyrimidine (3e)

Isolated as a brown solid, yield 72% (190 mg), m.p 137-139 °C, IR (ATR): 3216, 3025, 2957, 1599, 1486, 1269, 1158, 1062, 981, 755  $\text{cm}^{-1}$ ,  $^1\text{H}$  NMR (400 MHz,  $\text{CDCl}_3$ )  $\delta$  7.29 (m, 6H), 7.06 – 7.02 (m, 4H), 6.19 (s, 1H), 3.32 (s, 2H), 2.39 (t,  $J = 7.5$  Hz, 2H), 2.27 (s, 3H), 1.58 – 1.48 (m, 2H), 0.79 (t,  $J = 7.4$  Hz, 3H) ppm,  $^{13}\text{C}$  NMR (125 MHz,  $\text{CDCl}_3$ )  $\delta$  170.99, 148.60, 146.82, 141.47, 129.24, 128.61, 128.32, 127.90, 127.81, 102.33, 67.10, 44.77, 42.41, 19.26, 14.48, 13.59 ppm, ESI-MS:  $m/z$  330  $[\text{M}+\text{H}]^+$ , HRMS (ESI) Anal. calcd. for  $\text{C}_{22}\text{H}_{24}\text{N}_3$   $m/z$  330.1964  $[\text{M}+\text{H}]^+$ , found 330.1960.

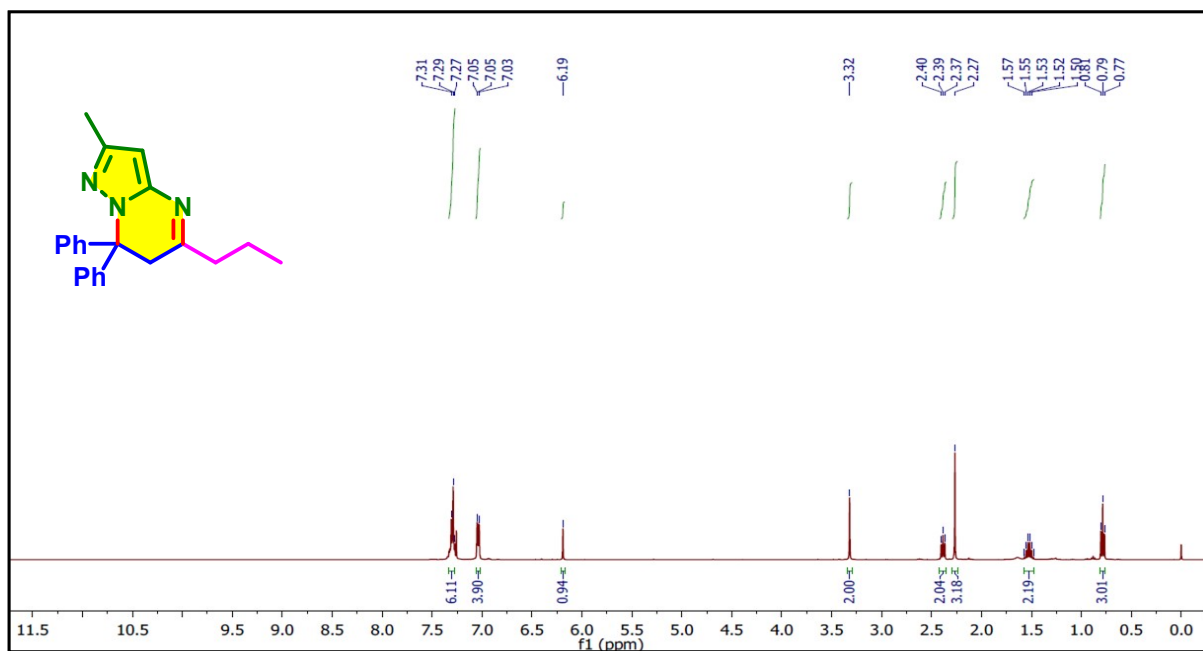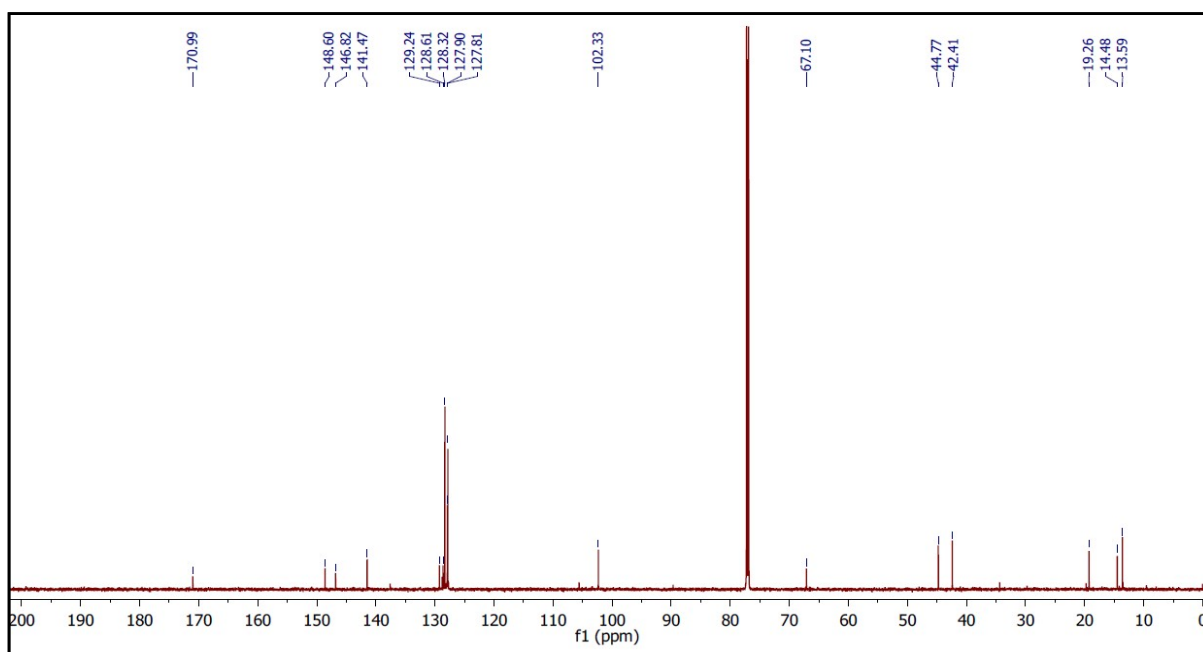



## 2-methyl-7,7-diphenyl-5-(thiophen-2-yl)-6,7-dihydropyrazolo[1,5-*a*]pyrimidine (3f)

Isolated as a red solid, yield 76% (193 mg), m.p 129-131 °C, IR (ATR): 3212, 2952, 2326, 1702, 1626, 1452, 1246, 1124, 856, 726  $\text{cm}^{-1}$ ,  $^1\text{H}$  NMR (400 MHz,  $\text{CDCl}_3$ )  $\delta$  7.81 (dd,  $J = 2.8, 1.2$  Hz, 1H), 7.66 (dd,  $J = 5.1, 1.2$  Hz, 1H), 7.35 – 7.33 (m, 1H), 7.33 – 7.31 (m, 1H), 7.30 – 7.28 (m, 4H), 7.27 – 7.25 (m, 1H), 7.16 – 7.12 (m, 4H), 6.27 (s, 1H), 3.72 (s, 2H), 2.30 (s, 3H) ppm,  $^{13}\text{C}$  NMR (100 MHz,  $\text{CDCl}_3$ )  $\delta$  158.39, 148.97, 147.41, 141.63, 141.30, 128.43, 127.95, 127.80, 127.40, 126.69, 126.35, 103.54, 67.36, 42.96, 14.50 ppm, ESI-MS:  $m/z$  370  $[\text{M}+\text{H}]^+$ , HRMS (ESI) Anal. calcd. for  $\text{C}_{23}\text{H}_{20}\text{N}_3\text{S}$   $m/z$  370.1372  $[\text{M}+\text{H}]^+$ , found 370.1382.

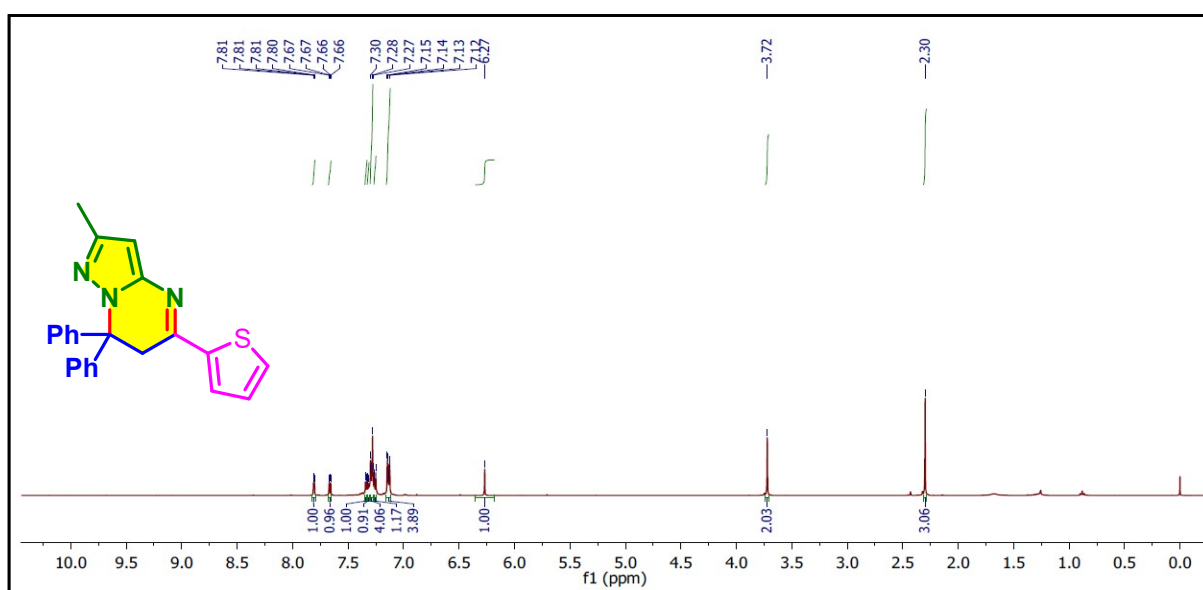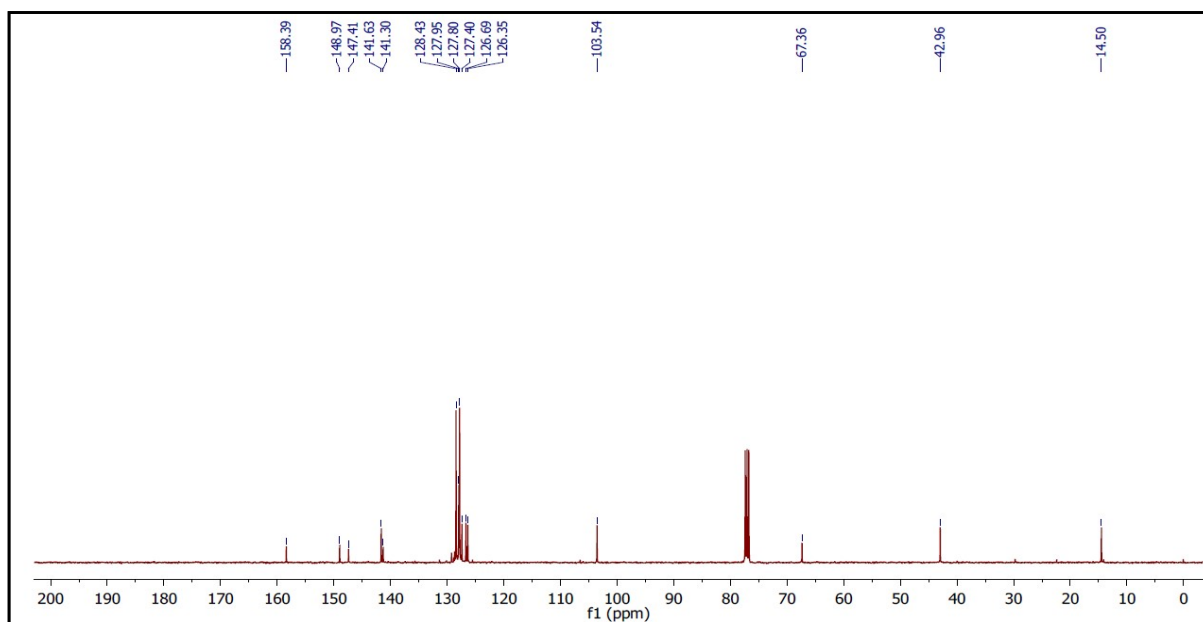

## 2,7,7-triphenyl-5-(*p*-tolyl)-6,7-dihydropyrazolo[1,5-*a*]pyrimidine (3g)

Isolated as a light yellow solid, yield 85% (250 mg), m.p 216-218 °C, IR (ATR): 3058, 3021, 1711, 1606, 1487, 1382, 1227, 1041, 914, 751, 698 cm<sup>-1</sup>, <sup>1</sup>H NMR (400 MHz, CDCl<sub>3</sub>) δ 7.88 (d, *J* = 8.2 Hz, 2H), 7.83 (d, *J* = 7.2 Hz, 2H), 7.36 (t, *J* = 7.5 Hz, 2H), 7.28 (m, 7H), 7.24 (s, 2H), 7.22 – 7.19 (m, 4H), 6.81 (s, 1H), 3.82 (s, 2H), 2.40 (s, 3H) ppm, <sup>13</sup>C NMR (100 MHz, CDCl<sub>3</sub>) δ 163.04, 151.09, 147.85, 141.90, 141.66, 134.39, 133.76, 129.57, 128.50, 128.34, 127.90, 127.73, 127.00, 125.69, 100.71, 67.72, 41.52, 21.56 ppm, ESI-MS: *m/z* 440 [M+H]<sup>+</sup>, HRMS (ESI) Anal. calcd. for C<sub>31</sub>H<sub>26</sub>N<sub>3</sub> *m/z* 440.2121 [M+H]<sup>+</sup>, found 440.2110.

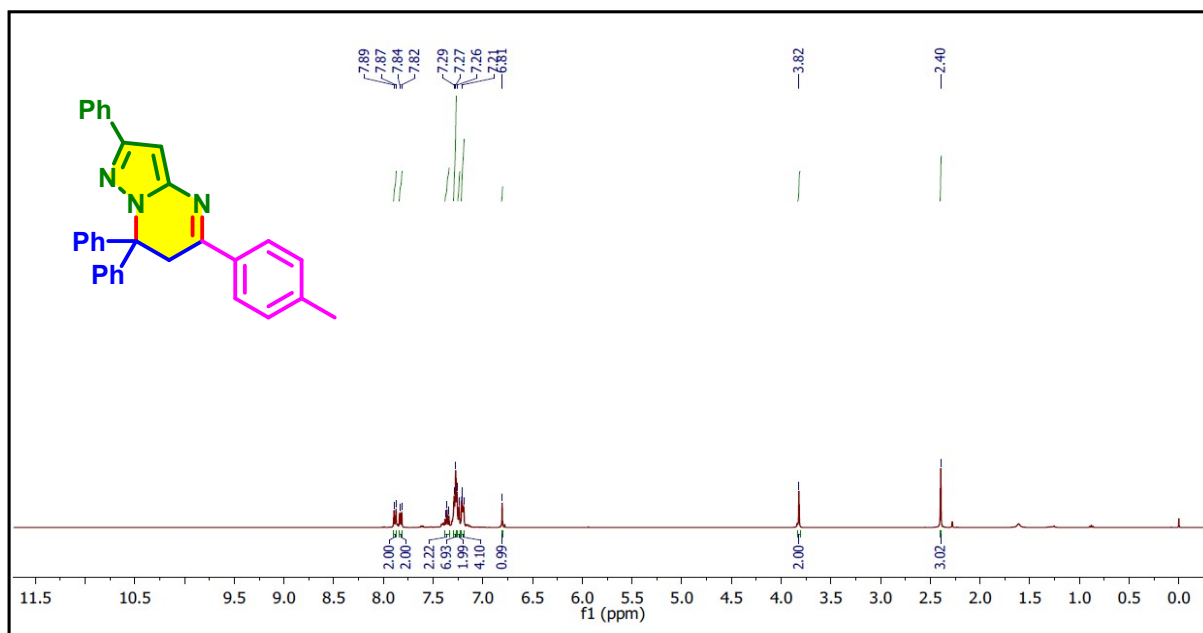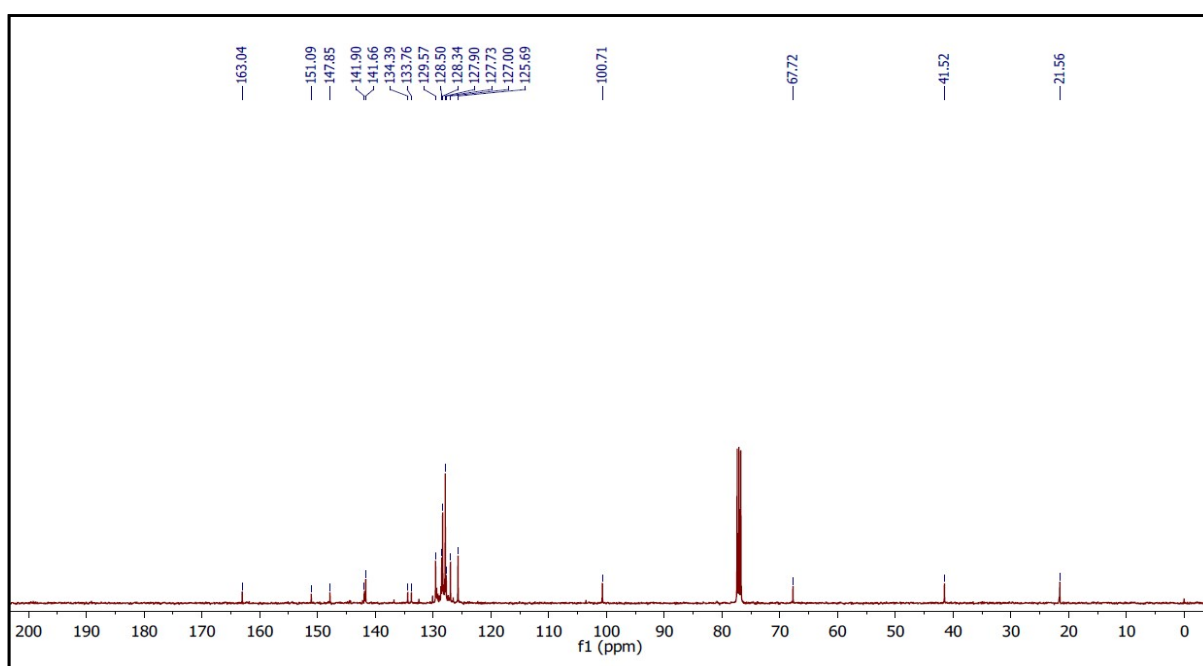

### 5,7,7-triphenyl-6,7-dihydropyrazolo[1,5-*a*]pyrimidine (3h)

Isolated as a yellow solid, yield 88% (216 mg), m.p 183-185 °C, IR (ATR): 3061, 3023, 2244, 1563, 1502, 1396, 1211, 1137, 1095, 816, 755  $\text{cm}^{-1}$ ,  $^1\text{H}$  NMR (400 MHz,  $\text{CDCl}_3$ )  $\delta$  7.99 – 7.92 (m, 2H), 7.61 (d,  $J = 1.8$  Hz, 1H), 7.47-7.42 (m, 3H), 7.31-7.28 (m, 6H), 7.13 – 7.08 (m, 4H), 6.53 (s, 1H), 3.87 (s, 2H) ppm,  $^{13}\text{C}$  NMR (100 MHz,  $\text{CDCl}_3$ )  $\delta$  163.30, 146.74, 141.34, 140.03, 137.16, 131.29, 128.79, 128.48, 128.12, 127.78, 126.98, 103.98, 67.67, 41.48 ppm, ESI-MS:  $m/z$  350  $[\text{M}+\text{H}]^+$ , HRMS (ESI) Anal. calcd. for  $\text{C}_{24}\text{H}_{20}\text{N}_3$   $m/z$  350.1651  $[\text{M}+\text{H}]^+$ , found 350.1646.

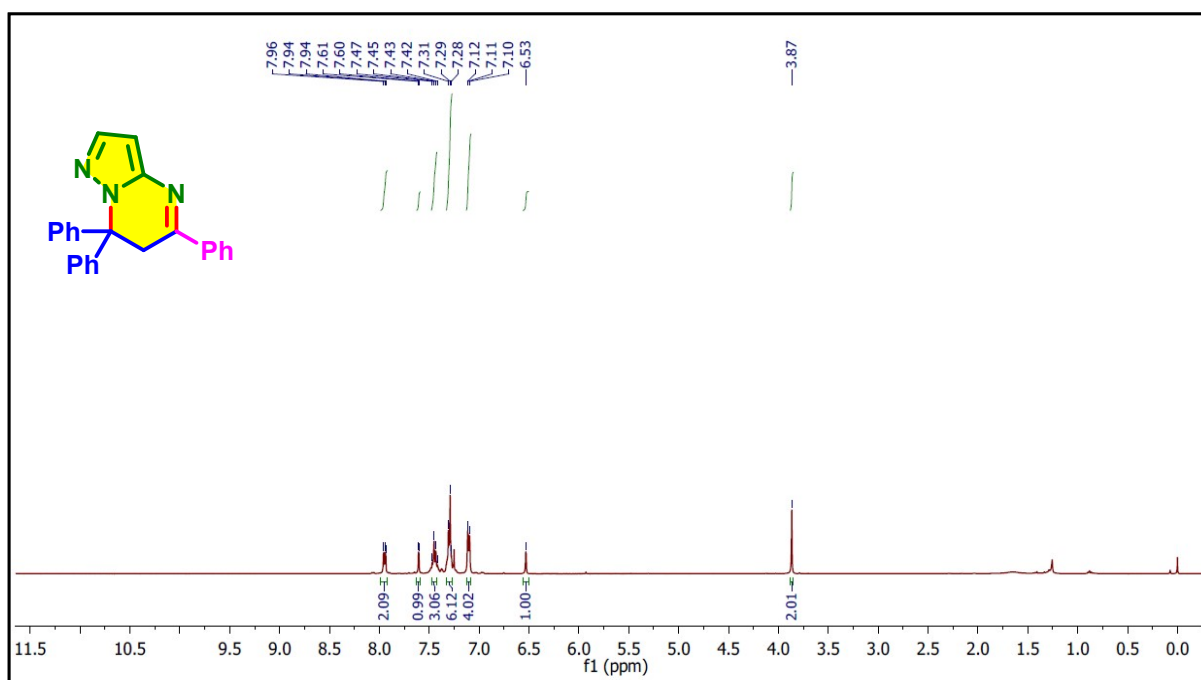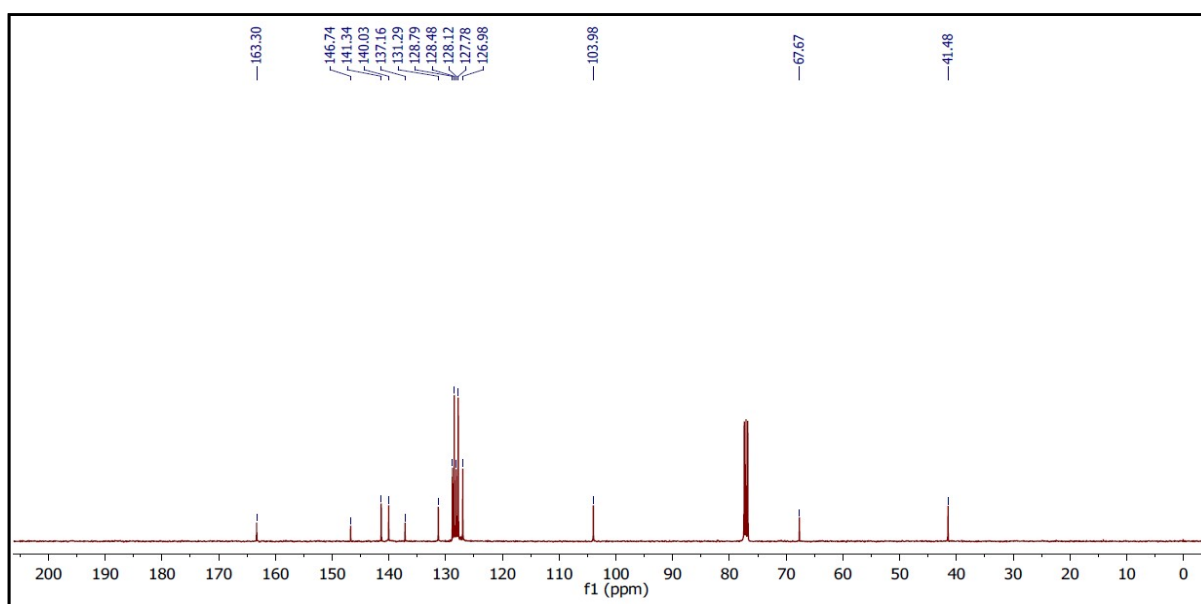

### 5-(4-methoxyphenyl)-7,7-diphenyl-6,7-dihydropyrazolo[1,5-a]pyrimidine (3i)

Isolated as a yellow solid, yield 86% (207 mg), m.p 200-202 °C, IR (ATR): 3281, 3023, 2307, 1663, 1514, 1477, 1270, 1215, 1037, 982, 749, 693  $\text{cm}^{-1}$ ,  $^1\text{H}$  NMR (400 MHz,  $\text{CDCl}_3$ )  $\delta$  7.93 (d,  $J = 8.9$  Hz, 2H), 7.58 (d,  $J = 1.8$  Hz, 1H), 7.31-7.24 (m, 6H), 7.13-7.09 (m, 4H), 6.93 (d,  $J = 8.9$  Hz, 2H), 6.47 (s, 1H), 3.84 (s, 3H), 3.81 (s, 2H) ppm,  $^{13}\text{C}$  NMR (125 MHz,  $\text{CDCl}_3$ )  $\delta$  162.66, 162.28, 146.94, 141.47, 139.96, 129.71, 128.82, 128.45, 128.06, 127.79, 114.15, 103.28, 67.58, 55.47, 41.25 ppm, ESI-MS:  $m/z$  380  $[\text{M}+\text{H}]^+$ , HRMS (ESI) Anal. calcd. for  $\text{C}_{25}\text{H}_{22}\text{N}_3\text{O}$   $m/z$  380.1757  $[\text{M}+\text{H}]^+$ , found 380.1750.

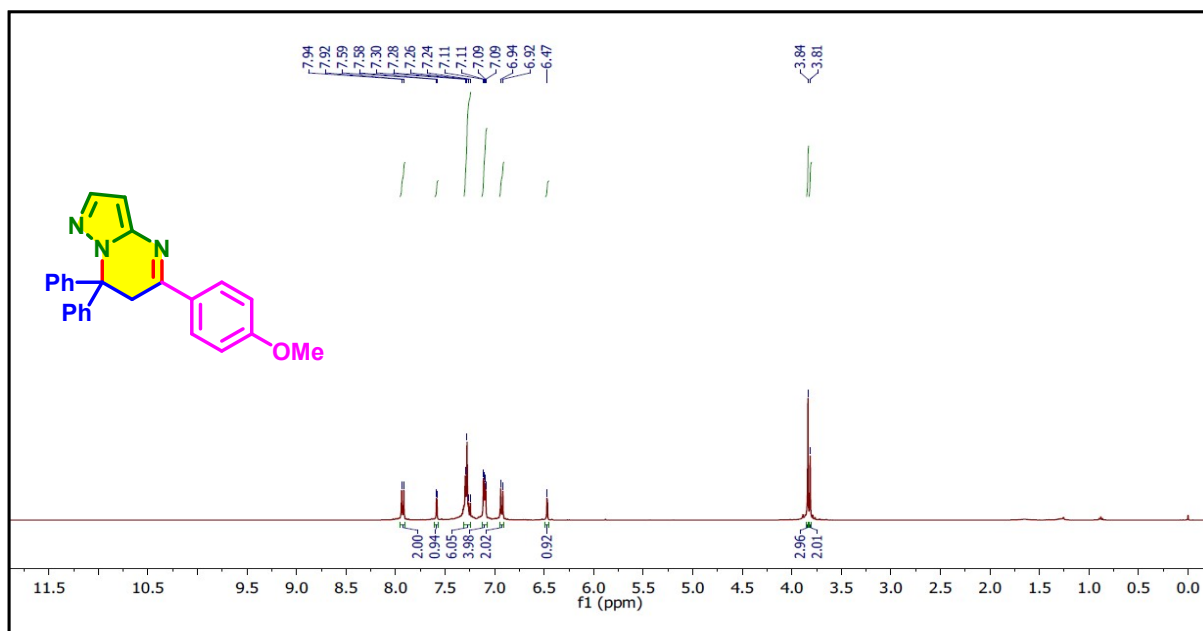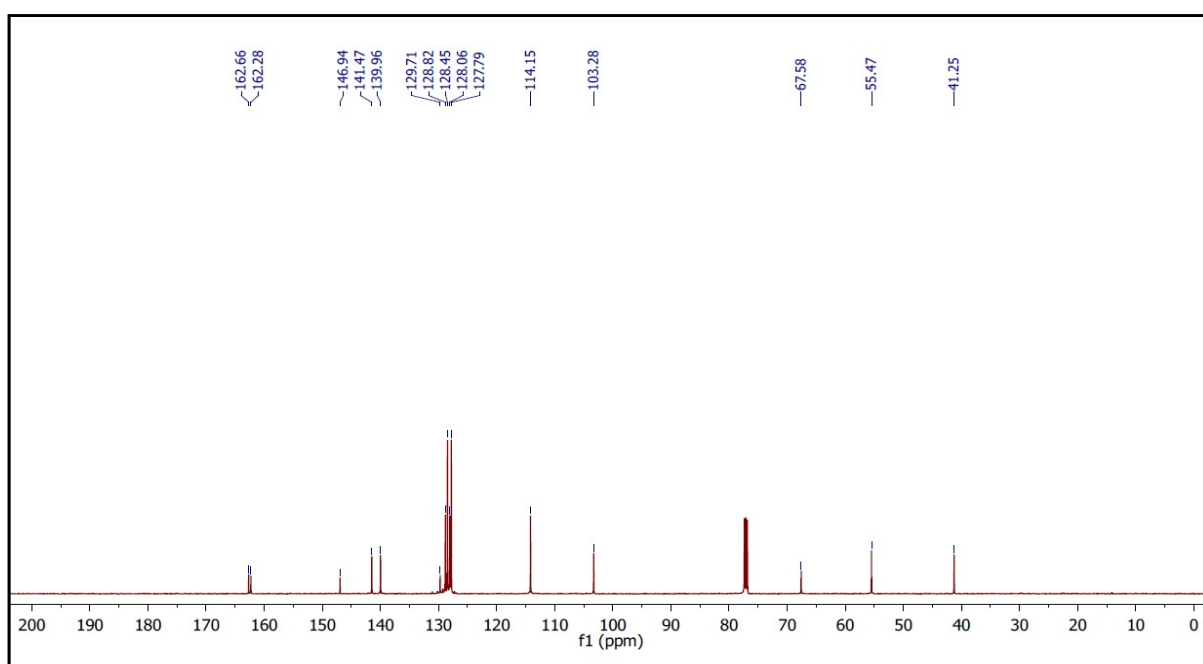

### 7,7-diphenyl-5-(*p*-tolyl)-6,7-dihydropyrazolo[1,5-*a*]pyrimidine (3j)

Isolated as a red solid, yield 83% (202 mg), m.p 172-174 °C, IR (ATR): 3021, 2959, 1597, 1488, 1412, 1269, 1214, 750, 668  $\text{cm}^{-1}$ ,  $^1\text{H}$  NMR (500 MHz,  $\text{CDCl}_3$ )  $\delta$  7.85 (d,  $J = 8.2$  Hz, 2H), 7.59 (d,  $J = 1.6$  Hz, 1H), 7.32 – 7.25 (m, 6H), 7.23 (d,  $J = 8.3$  Hz, 2H), 7.12 – 7.08 (m, 4H), 6.50 (s, 1H), 3.83 (s, 2H), 2.38 (s, 3H) ppm,  $^{13}\text{C}$  NMR (100 MHz,  $\text{CDCl}_3$ )  $\delta$  163.26, 146.84, 141.90, 141.41, 139.99, 134.39, 129.55, 128.47, 128.09, 127.79, 127.01, 103.66, 67.64, 41.38, 21.55 ppm, ESI-MS:  $m/z$  364  $[\text{M}+\text{H}]^+$ , HRMS (ESI) Anal. calcd. for  $\text{C}_{25}\text{H}_{22}\text{N}_3$   $m/z$  364.1808  $[\text{M}+\text{H}]^+$ , found 364.1802.

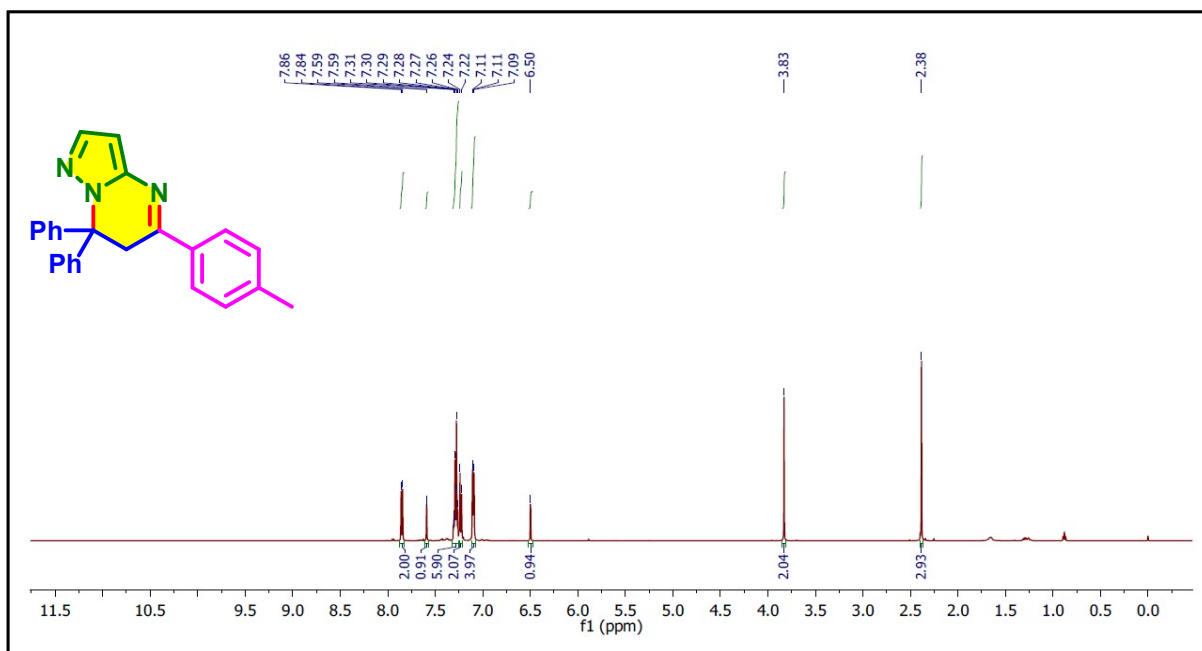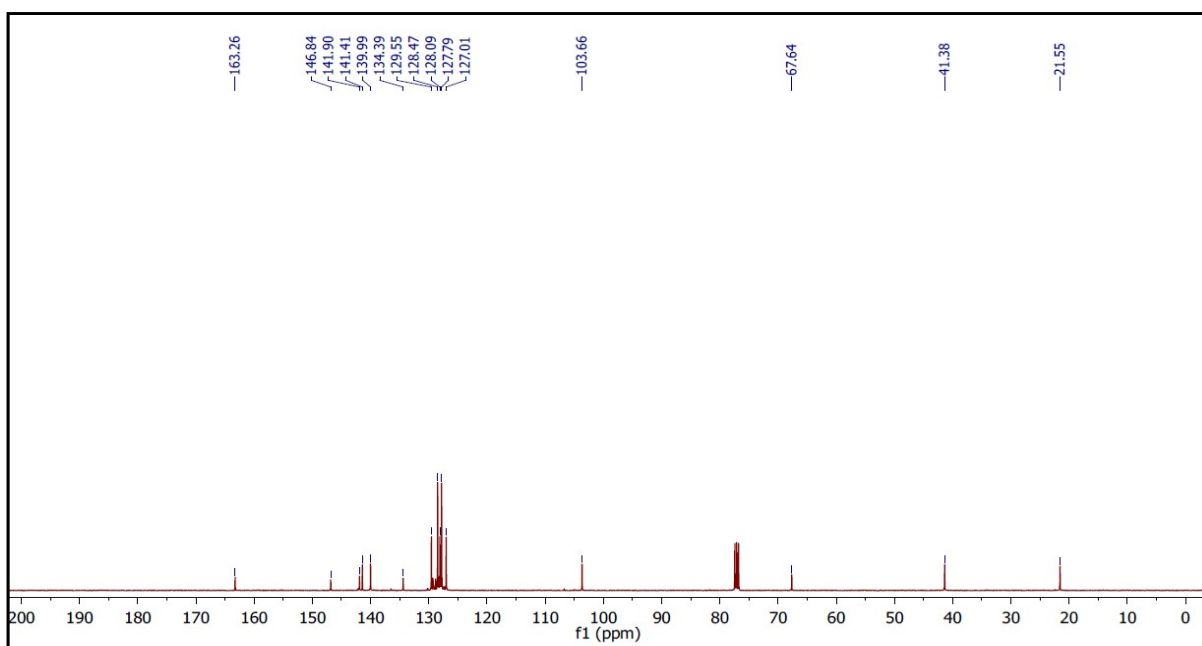

## 2,4,4-triphenyl-3,4-dihydropyrimido[1,2-*a*]indole-10-carbonitrile (3k)

Isolated as a light yellow solid, yield 75% (223 mg), m.p 289-291 °C, IR (ATR): 3254, 3020, 2134, 1709, 1560, 1445, 1254, 1080, 932, 753  $\text{cm}^{-1}$ ,  $^1\text{H}$  NMR (400 MHz,  $\text{CDCl}_3$ )  $\delta$  8.04-8.01 (m, 2H), 7.70 (d,  $J = 7.9$  Hz, 1H), 7.45 – 7.41 (m, 1H), 7.38 (m, 2H), 7.28-7.25 (s, 3H), 7.24 – 7.22 (m, 2H), 7.18 (s, 1H), 7.14 – 7.08 (m, 1H), 7.04-7.00 (m, 4H), 6.87-6.28 (m, 1H), 5.86 (d,  $J = 8.5$  Hz, 1H), 3.82 (s, 2H) ppm,  $^{13}\text{C}$  NMR (100 MHz,  $\text{CDCl}_3$ )  $\delta$  165.68, 148.47, 139.93, 136.16, 134.70, 132.26, 129.02, 128.86, 128.76, 127.81, 127.55, 124.42, 122.11, 119.91, 115.37, 113.85, 84.82, 67.05, 42.31 ppm, ESI-MS:  $m/z$  424  $[\text{M}+\text{H}]^+$ , HRMS (ESI) Anal. calcd. for  $\text{C}_{30}\text{H}_{22}\text{N}_3$   $m/z$  424.1808  $[\text{M}+\text{H}]^+$ , found 424.1800.

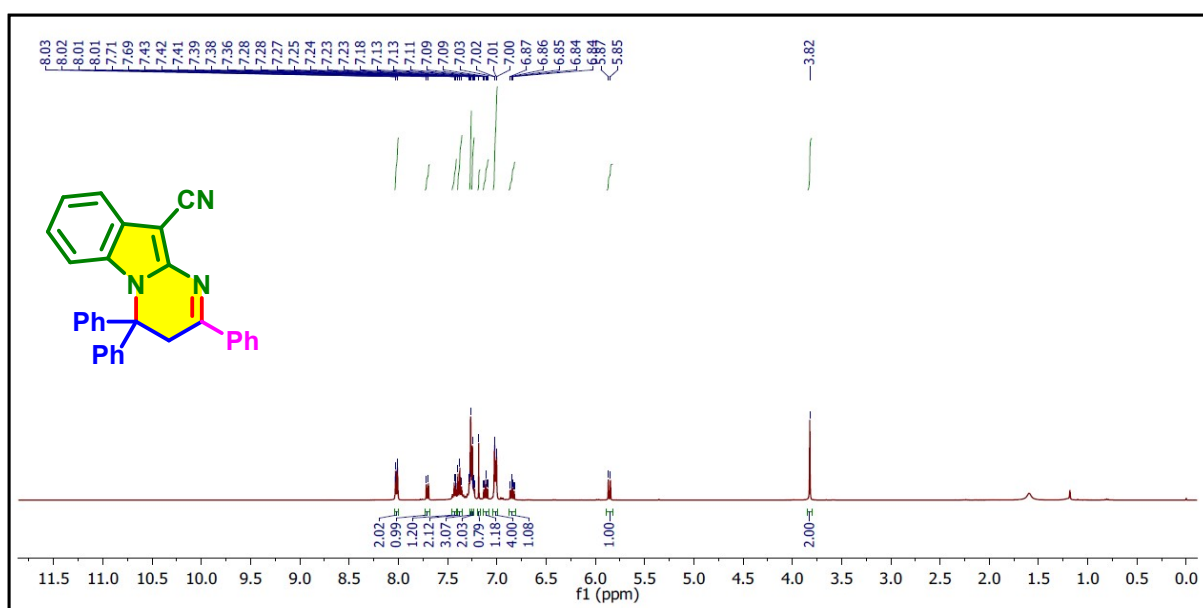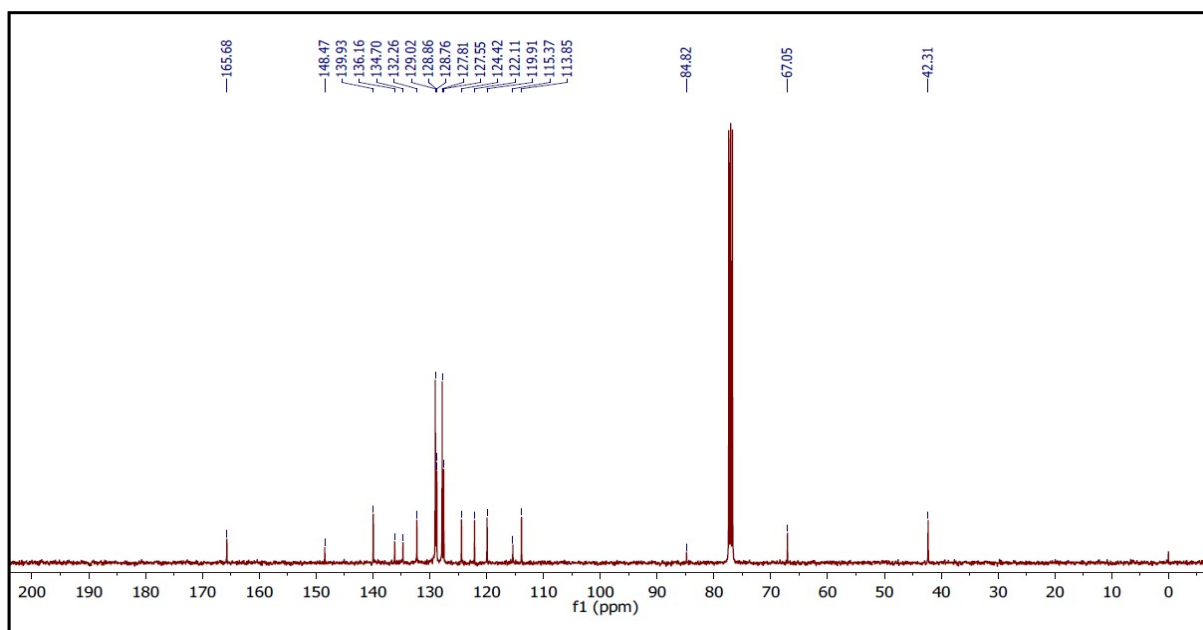

### 4,4-diphenyl-2-(p-tolyl)-3,4-dihydropyrimido[1,2-a]indole-10-carbonitrile (3I)

Isolated as a red solid, yield 78% (228 mg), m.p 270-272 °C, IR (ATR): 3289, 3017, 2105, 1669, 1549, 1475, 1219, 1044, 907, 753  $\text{cm}^{-1}$ ,  $^1\text{H}$  NMR (500 MHz,  $\text{CDCl}_3$ )  $\delta$  7.92 (d,  $J = 8.2$  Hz, 2H), 7.69 (d,  $J = 7.9$  Hz, 1H), 7.27 – 7.21 (m, 6H), 7.18 (s, 1H), 7.16 (s, 1H), 7.10 (t,  $J = 7.5$  Hz, 1H), 7.03-6.99 (m, 4H), 6.85 – 6.80 (m, 1H), 5.85 (d,  $J = 8.5$  Hz, 1H), 3.79 (s, 2H), 2.32 (s, 3H) ppm,  $^{13}\text{C}$  NMR (100 MHz,  $\text{CDCl}_3$ )  $\delta$  165.64, 148.74, 143.14, 140.01, 134.67, 133.48, 129.62, 128.99, 128.70, 127.81, 127.60, 124.23, 122.03, 119.81, 115.51, 113.81, 84.34, 67.02, 42.17, 21.66 ppm, ESI-MS:  $m/z$  438  $[\text{M}+\text{H}]^+$ , HRMS (ESI) Anal. calcd. for  $\text{C}_{31}\text{H}_{24}\text{N}_3$   $m/z$  438.1964  $[\text{M}+\text{H}]^+$ , found 438.1953.

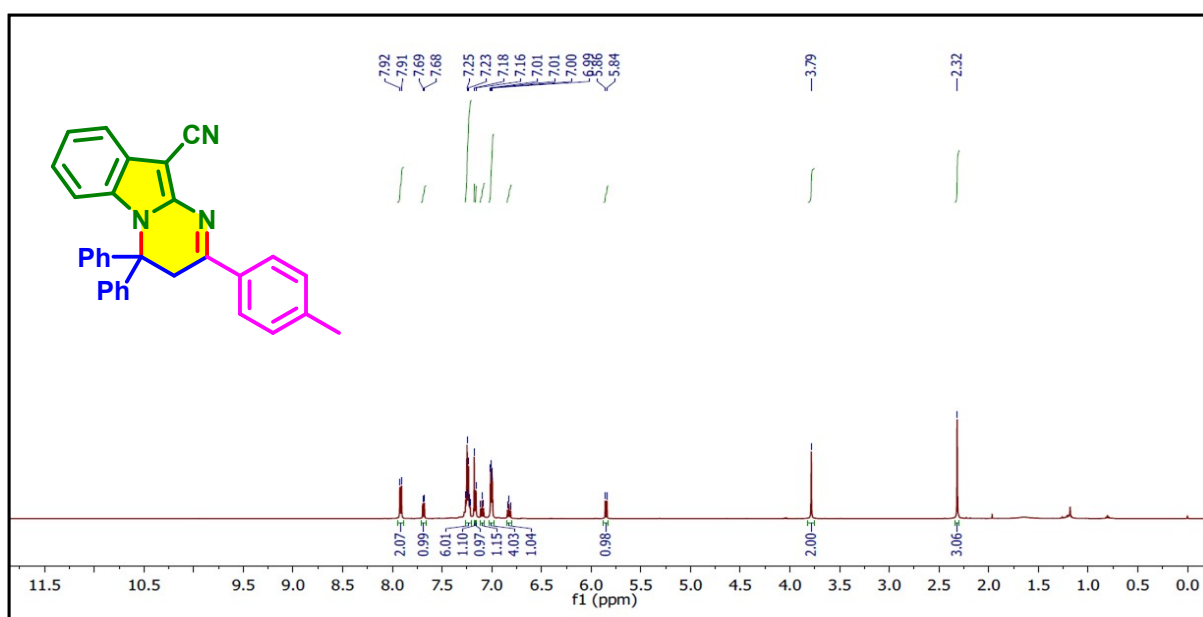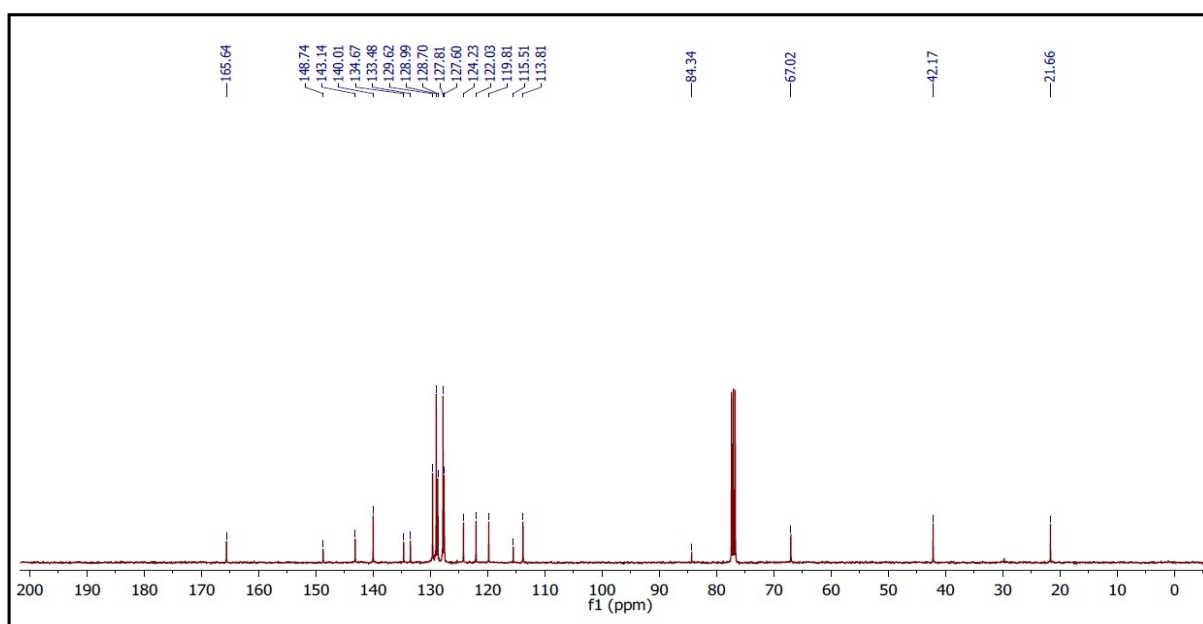

## 2-methyl-5,7-diphenylpyrazolo[1,5-*a*]pyrimidine (3m)

Isolated as a cream solid, yield 95% (263 mg), m.p 118-120 °C, IR (ATR): 3279, 3006, 1659, 1570, 1264, 1065, 767, 684  $\text{cm}^{-1}$ ,  $^1\text{H}$  NMR (400 MHz,  $\text{CDCl}_3$ )  $\delta$  8.11 (d,  $J = 1.8$  Hz, 1H), 8.10 – 8.06 (m, 3H), 7.57-7.53 (m, 3H), 7.53 – 7.46 (m, 3H), 7.24 (s, 1H), 6.57 (s, 1H), 2.53 (s, 3H) ppm,  $^{13}\text{C}$  NMR (100 MHz,  $\text{CDCl}_3$ )  $\delta$  155.86, 155.48, 150.70, 146.20, 137.78, 131.72, 130.91, 130.14, 129.32, 128.91, 128.71, 127.25, 104.46, 96.53, 14.97 ppm, ESI-MS:  $m/z$  286  $[\text{M}+\text{H}]^+$ , HRMS (ESI) Anal. calcd. for  $\text{C}_{19}\text{H}_{16}\text{N}_3$   $m/z$  286.1338  $[\text{M}+\text{H}]^+$ , found 286.1335.

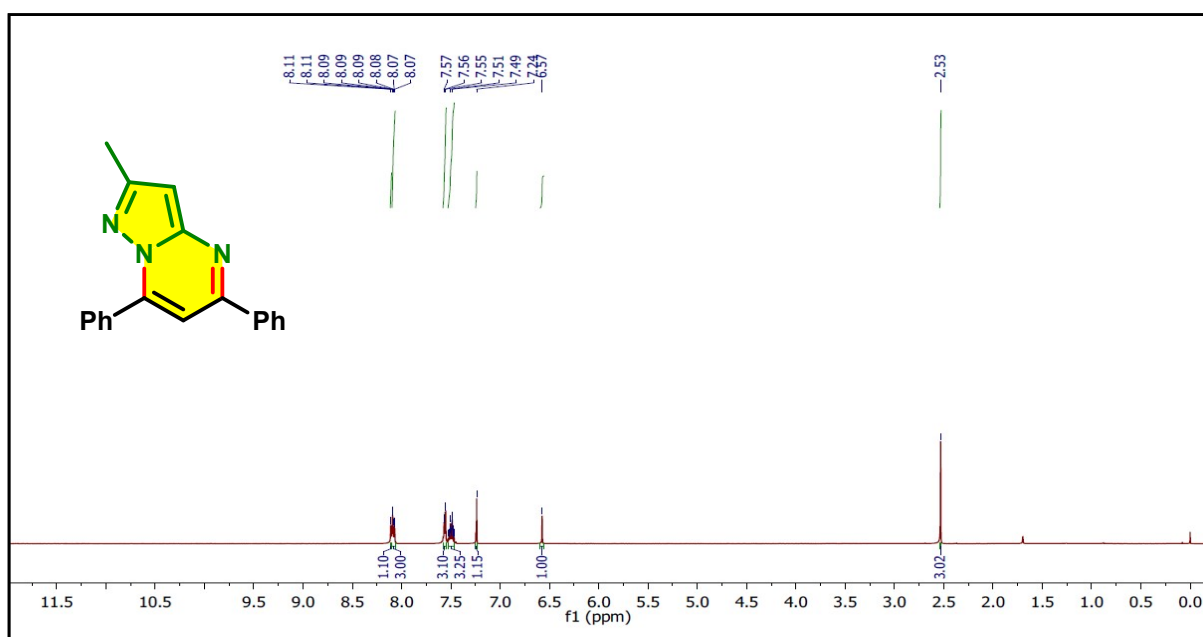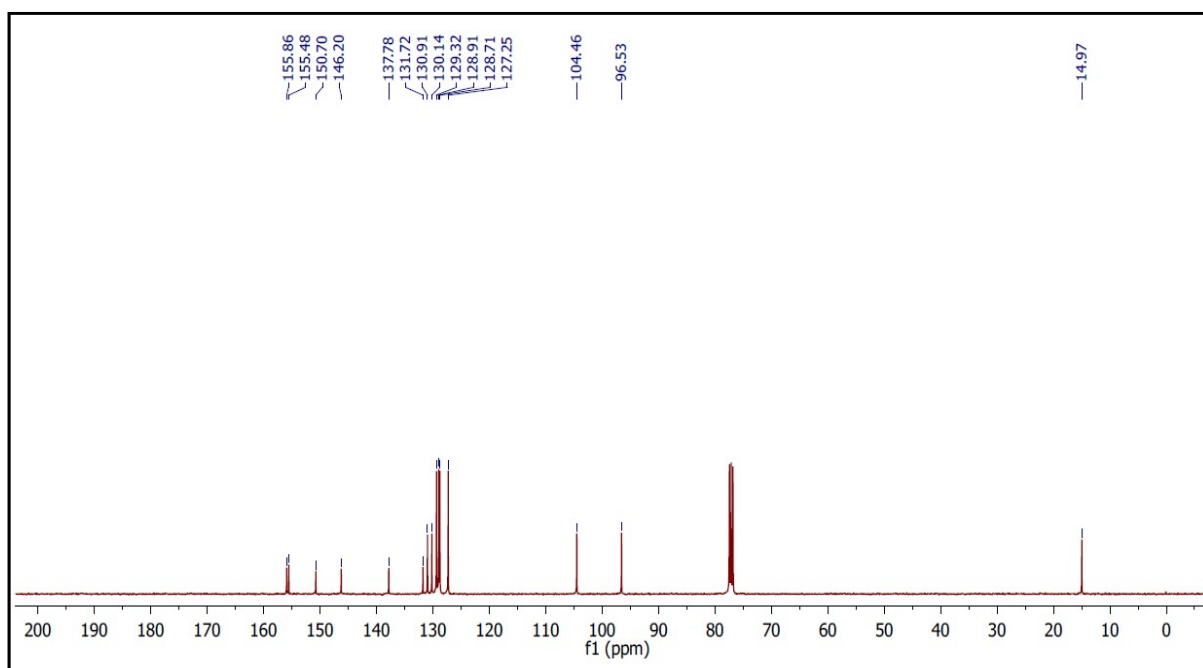



## 2,5,7-triphenylpyrazolo[1,5-a]pyrimidine (3n)

Isolated as a cream solid, yield 90% (303 mg), m.p 163-165 °C, IR (ATR): 3249, 3056, 1687, 1582, 1202, 1026, 732, 695  $\text{cm}^{-1}$ ,  $^1\text{H}$  NMR (500 MHz,  $\text{CDCl}_3$ )  $\delta$  8.22 (m, 2H), 8.17 – 8.13 (m, 2H), 8.06 – 8.02 (m, 2H), 7.63 – 7.59 (m, 3H), 7.56 – 7.50 (m, 3H), 7.47 (t,  $J = 7.5$  Hz, 2H), 7.42 – 7.38 (m, 1H), 7.35 (m, 1H), 7.11 (s, 1H) ppm,  $^{13}\text{C}$  NMR (100 MHz,  $\text{CDCl}_3$ )  $\delta$  156.30, 156.12, 151.15, 146.39, 137.65, 133.12, 131.52, 131.01, 130.28, 129.57, 128.96, 128.73, 128.60, 127.27, 126.66, 105.08, 93.81 ppm, ESI-MS:  $m/z$  348  $[\text{M}+\text{H}]^+$ , HRMS (ESI) Anal. calcd. for  $\text{C}_{24}\text{H}_{18}\text{N}_3$   $m/z$  348.1495  $[\text{M}+\text{H}]^+$ , found 348.1491.

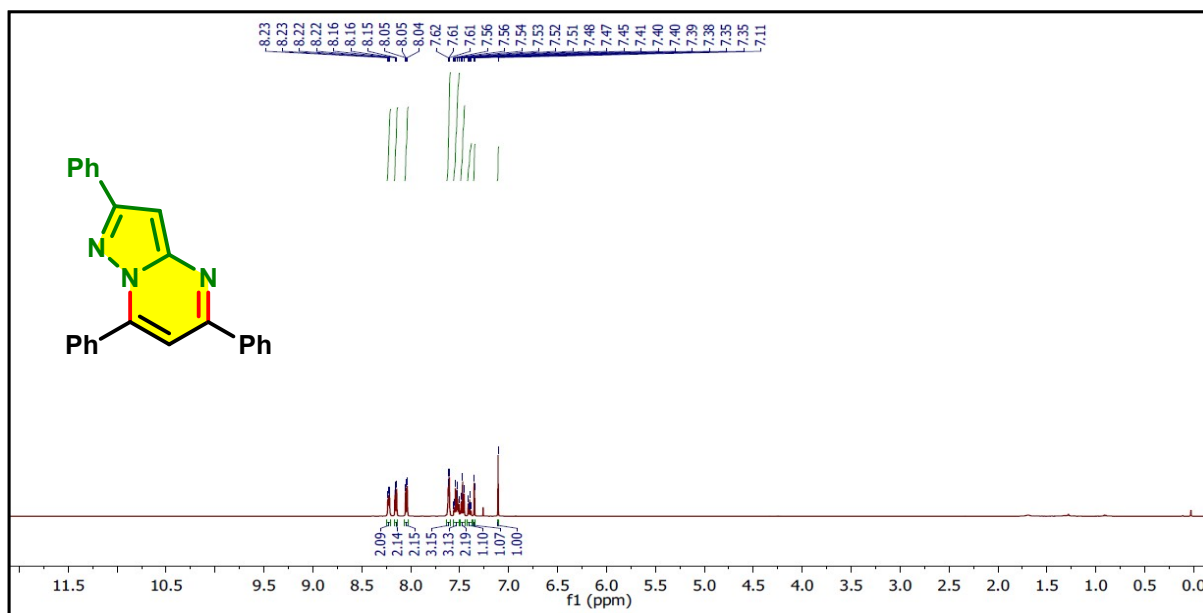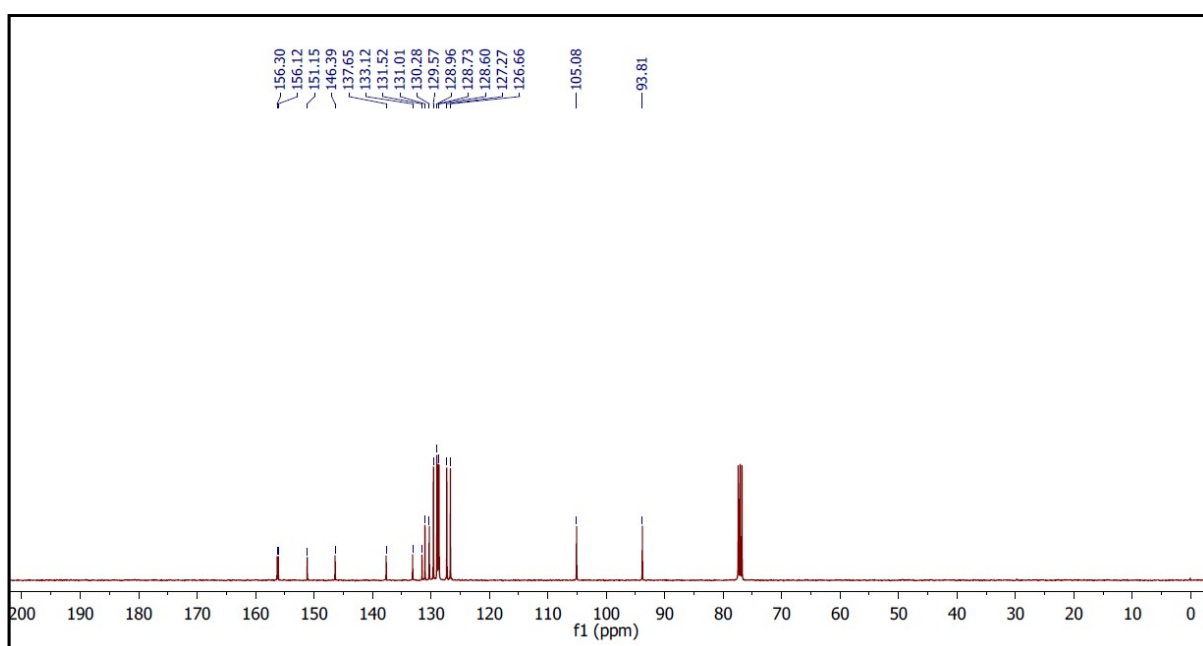

### 5,7-diphenylpyrazolo[1,5-a]pyrimidine (3o)

Isolated as a light yellow solid, yield 92% (242 mg), m.p 88-90 °C, IR (ATR): 3289, 3022, 1668, 1618, 1517, 1404, 1218, 1046, 905, 753  $\text{cm}^{-1}$ ,  $^1\text{H}$  NMR (400 MHz,  $\text{CDCl}_3$ )  $\delta$  8.17 (d,  $J = 2.3$  Hz, 1H), 8.15-8.12 (m, 2H), 8.08 – 8.05 (m, 2H), 7.60-7.59 (m, 3H), 7.54 – 7.49 (m, 3H), 7.34 (s, 1H), 6.81 (d,  $J = 2.3$  Hz, 1H) ppm,  $^{13}\text{C}$  NMR (100 MHz,  $\text{CDCl}_3$ )  $\delta$  156.23, 149.90, 146.87, 145.23, 137.55, 131.55, 130.99, 130.34, 129.28, 128.97, 128.76, 127.31, 105.24, 97.23 ppm, ESI-MS:  $m/z$  272  $[\text{M}+\text{H}]^+$ , HRMS (ESI) Anal. calcd. for  $\text{C}_{18}\text{H}_{14}\text{N}_3$   $m/z$  272.1182  $[\text{M}+\text{H}]^+$ , found 272.1180.

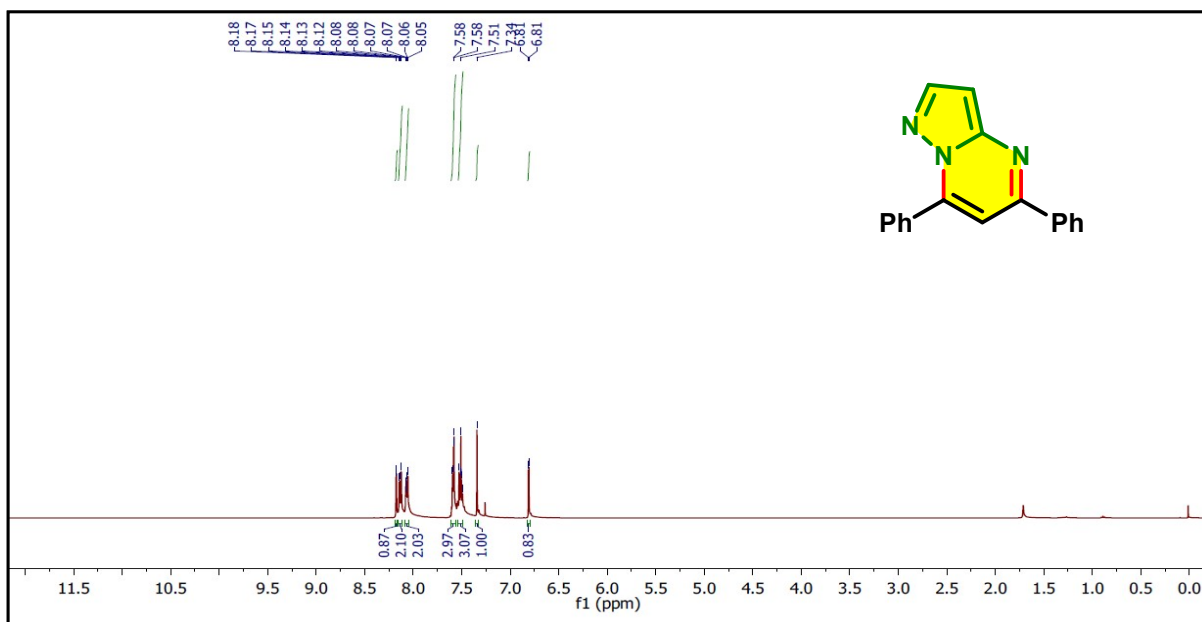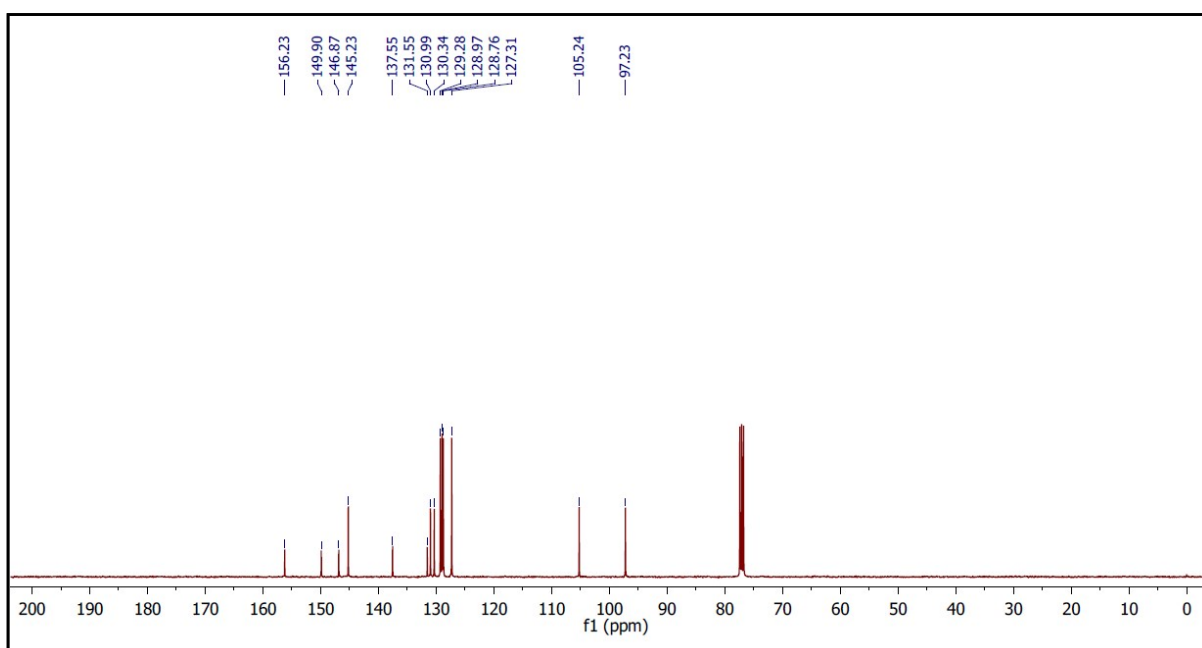

### 3-bromo-2-methyl-5,7-diphenylpyrazolo[1,5-a]pyrimidine (3p)

Isolated as a yellow solid, yield 86% (303 mg), m.p 147-149 °C, IR (ATR): 3289, 3020, 1669, 1618, 1549, 1516, 1214, 1045, 747, 667  $\text{cm}^{-1}$ ,  $^1\text{H}$  NMR (400 MHz,  $\text{CDCl}_3$ )  $\delta$  8.20 – 8.15 (m, 2H), 8.07 – 8.02 (m, 2H), 7.59 – 7.55 (m, 3H), 7.53 – 7.46 (m, 3H), 7.29 (s, 1H), 2.52 (s, 3H) ppm,  $^{13}\text{C}$  NMR (100 MHz,  $\text{CDCl}_3$ )  $\delta$  156.61, 153.62, 146.84, 146.67, 137.15, 131.20, 130.88, 130.51, 129.36, 128.92, 128.77, 127.40, 105.16, 85.35, 13.60 ppm, ESI-MS:  $m/z$  364  $[\text{M}+\text{H}]^+$ , HRMS (ESI) Anal. calcd. for  $\text{C}_{19}\text{H}_{15}\text{BrN}_3$   $m/z$  364.0443  $[\text{M}+\text{H}]^+$ , found 364.0439.

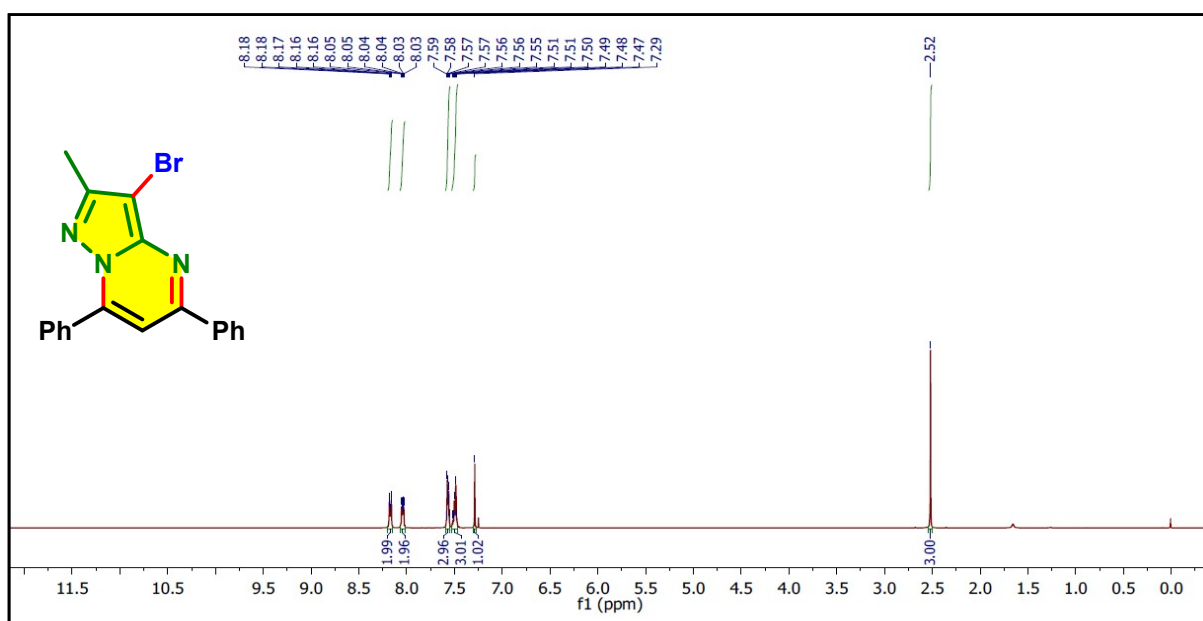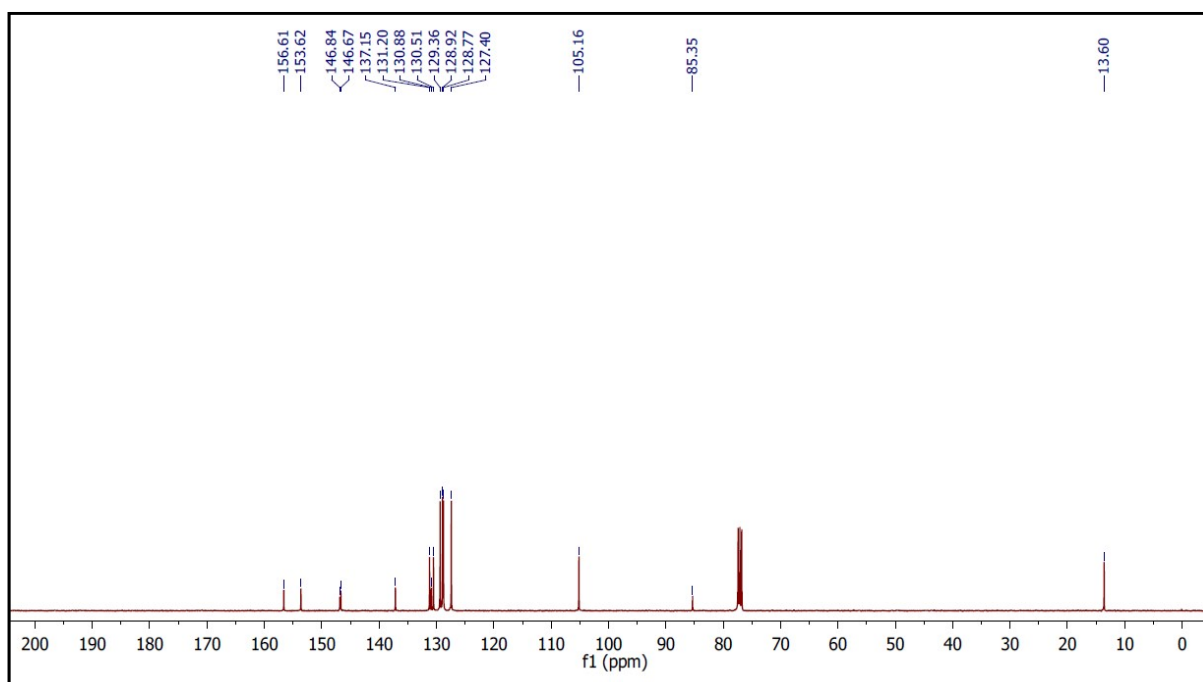

### 3-chloro-2-methyl-5,7-diphenylpyrazolo[1,5-a]pyrimidine (3q)

Isolated as a light yellow solid, yield 83% (257 mg), m.p 152-154 °C, IR (ATR): 3285, 3036, 1675, 1592, 1512, 1487, 1234, 1106, 987, 787, 665  $\text{cm}^{-1}$ ,  $^1\text{H}$  NMR (400 MHz,  $\text{CDCl}_3$ )  $\delta$  8.16-8.14 (m, 2H), 8.06 – 8.00 (m, 2H), 7.58 – 7.53 (m, 3H), 7.49-7.46 (m, 3H), 7.26 (s, 1H), 2.50 (s, 3H) ppm,  $^{13}\text{C}$  NMR (125 MHz,  $\text{CDCl}_3$ )  $\delta$  156.33, 152.06, 146.56, 145.42, 137.13, 131.20, 130.86, 130.50, 129.36, 128.91, 128.77, 127.38, 105.05, 99.26, 12.58 ppm, ESI-MS:  $m/z$  320  $[\text{M}+\text{H}]^+$ , HRMS (ESI) Anal. calcd. for  $\text{C}_{19}\text{H}_{15}\text{ClN}_3$   $m/z$  320.0949  $[\text{M}+\text{H}]^+$ , found 320.0947.

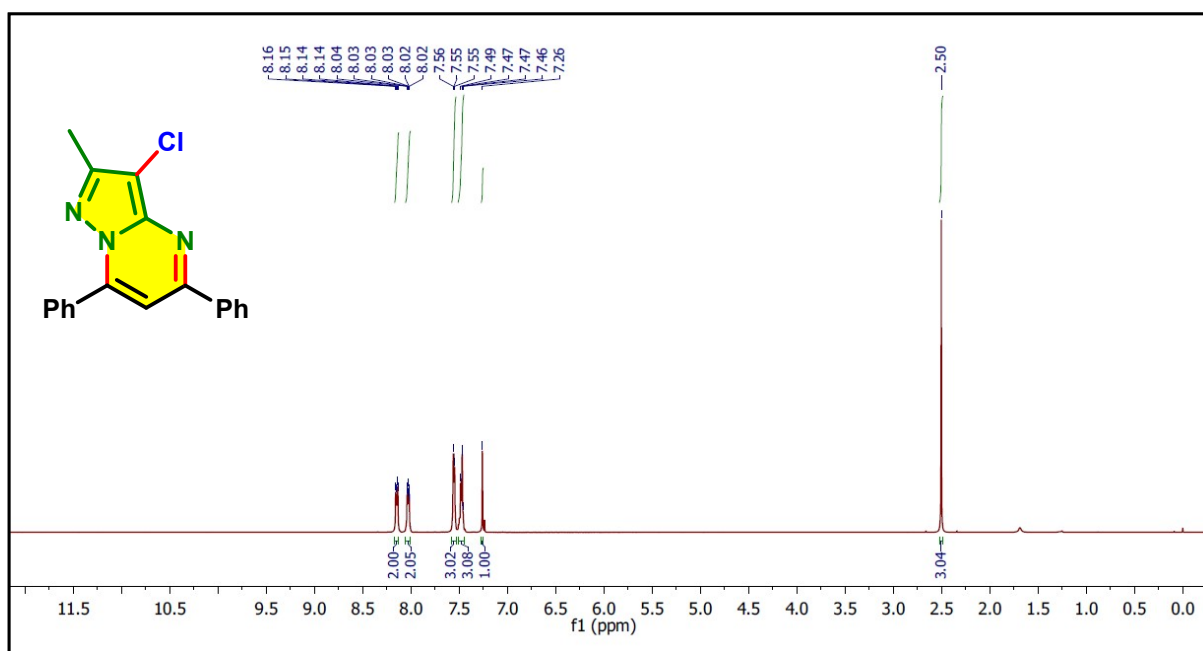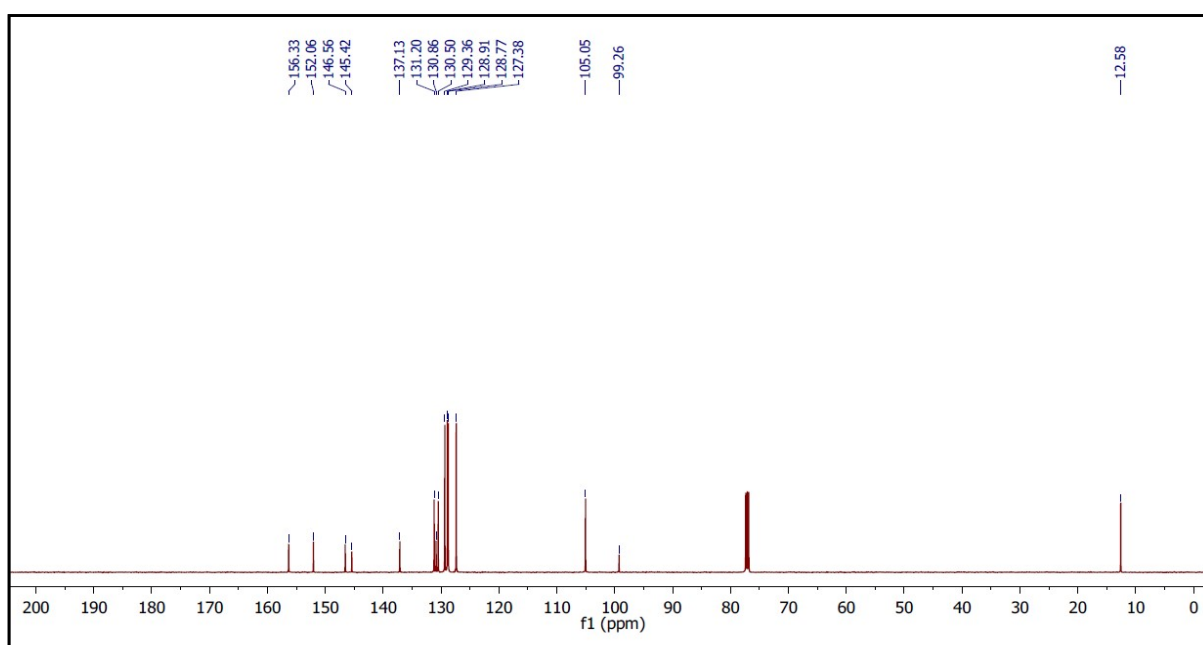

### 3-fluoro-2-methyl-5,7-diphenylpyrazolo[1,5-a]pyrimidine (3r)

Isolated as a yellow solid, yield 80% (236 mg), m.p 143-145 °C, IR (ATR): 3245, 3014, 1654, 1625, 1508, 1487, 1305, 1187, 1012, 765, 684  $\text{cm}^{-1}$ ,  $^1\text{H}$  NMR (400 MHz,  $\text{CDCl}_3$ )  $\delta$  8.15 (m, 2H), 8.08 – 8.02 (m, 2H), 7.58 (m, 3H), 7.54 – 7.48 (m, 3H), 7.23 (s, 1H), 2.52 (s, 3H) ppm,  $^{13}\text{C}$  NMR (125 MHz,  $\text{CDCl}_3$ )  $\delta$  155.33, 145.92, 141.13 (d,  $J = 9.8$  Hz), 137.99, 137.20, 136.49 (d,  $J = 23.1$  Hz), 136.05, 131.14, 130.75, 130.40, 129.34, 128.92, 128.77, 127.27, 104.55, 11.06 ppm, ESI-MS:  $m/z$  304  $[\text{M}+\text{H}]^+$ , HRMS (ESI) Anal. calcd. for  $\text{C}_{19}\text{H}_{15}\text{FN}_3$   $m/z$  304.1244  $[\text{M}+\text{H}]^+$ , found 304.1241.

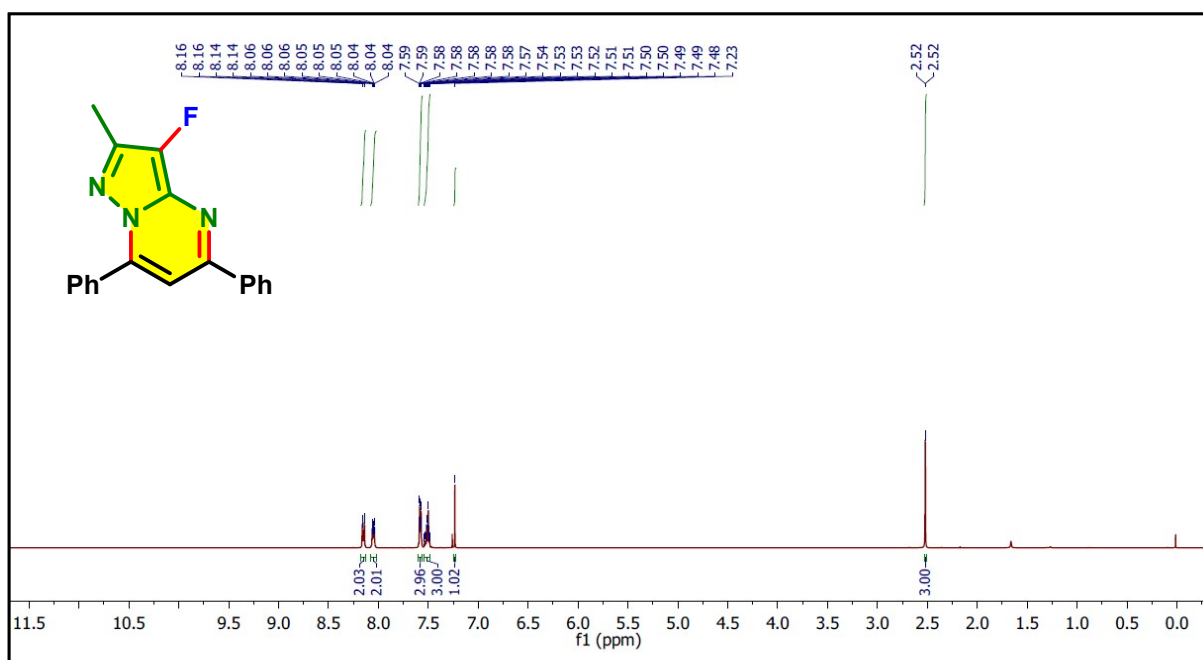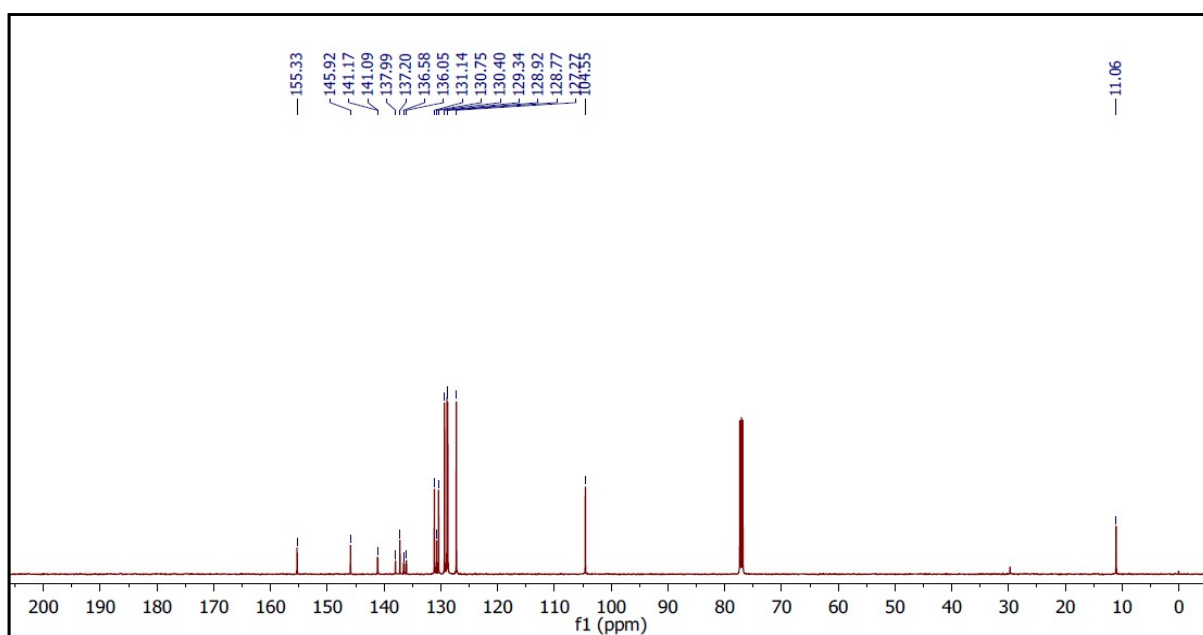

## 2-methyl-5,7-diphenyl-3-(phenylthio)pyrazolo[1,5-a]pyrimidine (3s)

Isolated as a colourless solid, yield 78% (297 mg), m.p 180-182 °C, IR (ATR): 3423, 3257, 3031, 2945, 1635, 1602, 1517, 1207, 1132, 986, 875, 784, 675  $\text{cm}^{-1}$ ,  $^1\text{H}$  NMR (400 MHz,  $\text{CDCl}_3$ )  $\delta$  8.21 – 8.16 (m, 2H), 8.14 – 8.08 (m, 2H), 7.64 – 7.58 (m, 3H), 7.52 – 7.46 (m, 3H), 7.40 (s, 1H), 7.21 (d,  $J = 4.4$  Hz, 4H), 7.13 – 7.06 (m, 1H), 2.53 (s, 3H) ppm,  $^{13}\text{C}$  NMR (125 MHz,  $\text{CDCl}_3$ )  $\delta$  159.73, 157.38, 151.43, 147.02, 138.54, 137.16, 131.22, 131.10, 130.57, 129.49, 128.89, 128.81, 127.57, 126.47, 125.15, 105.62, 96.19, 13.33 ppm, ESI-MS:  $m/z$  394  $[\text{M}+\text{H}]^+$ , HRMS (ESI) Anal. calcd. for  $\text{C}_{25}\text{H}_{20}\text{N}_3\text{S}$   $m/z$  394.1372  $[\text{M}+\text{H}]^+$ , found 394.1366.

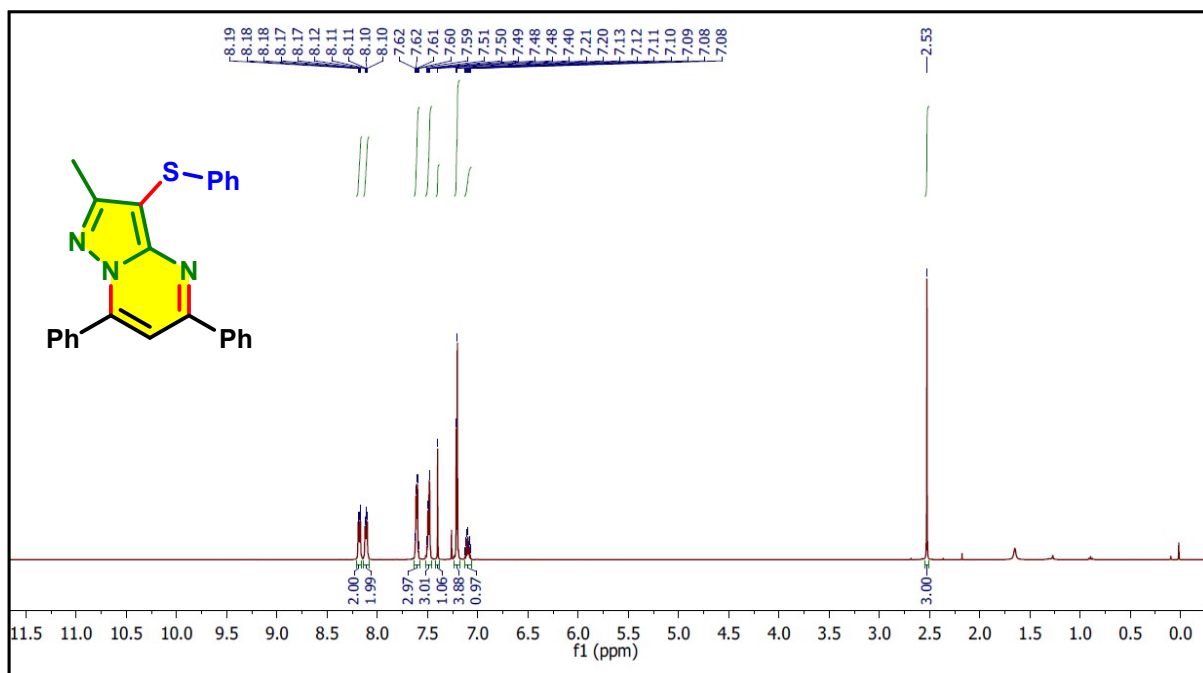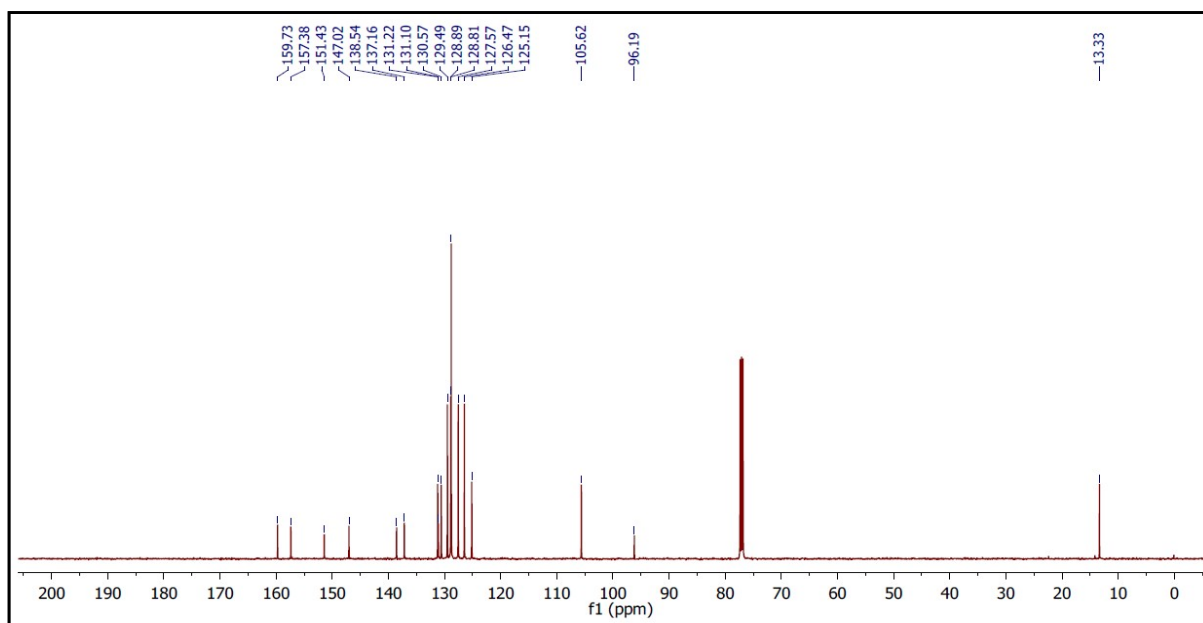

### 3-fluoro-2,5,7-triphenylpyrazolo[1,5-a]pyrimidine (3t)

Isolated as a light yellow solid, yield 82% (290 mg), m.p 170-172 °C, IR (ATR): 3466, 3238, 3067, 2926, 1679, 1635, 1606, 1549, 1430, 1224, 1158, 978, 845, 754, 692  $\text{cm}^{-1}$ ,  $^1\text{H}$  NMR (400 MHz,  $\text{CDCl}_3$ )  $\delta$  8.19-8.16 (m, 4H), 8.11 (d,  $J = 7.4$  Hz, 2H), 7.63 – 7.60 (m, 3H), 7.54-7.47 (m, 5H), 7.43-7.39 (m, 1H), 7.34 (s, 1H) ppm,  $^{13}\text{C}$  NMR (125 MHz,  $\text{CDCl}_3$ )  $\delta$  155.51, 145.96, 141.30, 141.27, 137.64, 137.42, 137.12, 135.43, 131.22, 130.83, 130.80, 130.57, 130.51, 129.56, 129.05, 128.97, 128.75, 128.68, 127.30, 127.10, 127.07, 105.32 ppm, ESI-MS:  $m/z$  366  $[\text{M}+\text{H}]^+$ , HRMS (ESI) Anal. calcd. for  $\text{C}_{24}\text{H}_{17}\text{FN}_3$   $m/z$  366.1401  $[\text{M}+\text{H}]^+$ , found 366.1400.

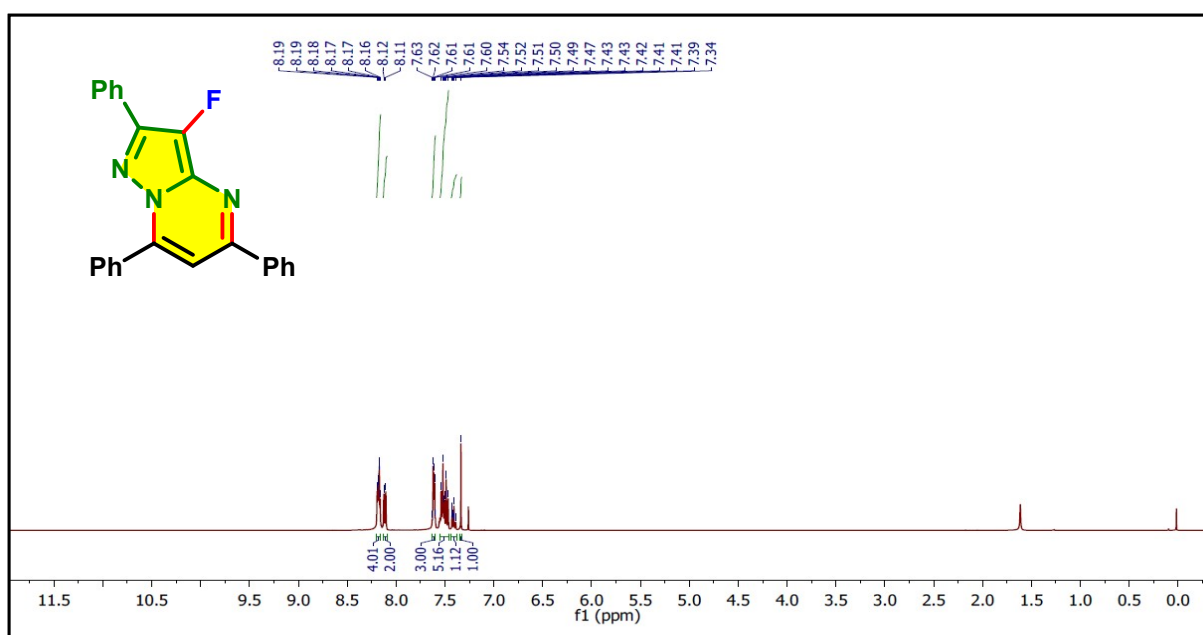

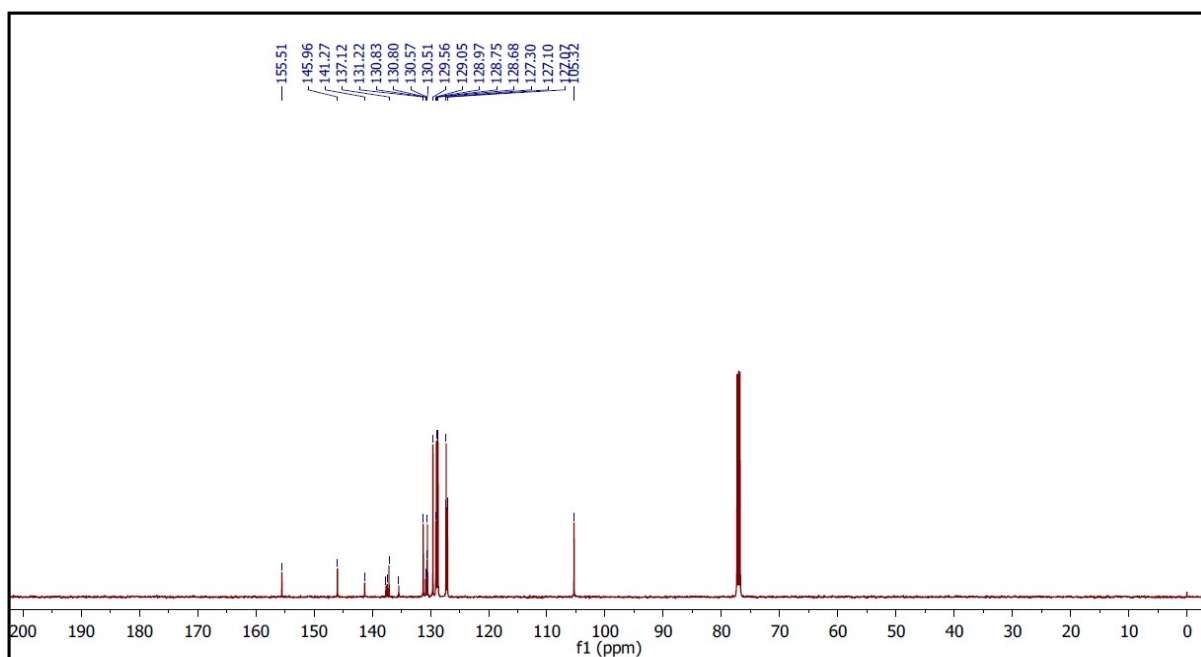

**(Z)-1-(2,6-dichloro-4-(trifluoromethyl)phenyl)-5-((1,3,3-triphenylallylidene)amino)-1H-pyrazole-3-carbonitrile (6aa)**

Isolated as a yellow solid, yield 95% (392 mg), m.p 233-235 °C, IR (ATR): 3061, 3023, 2244, 1563, 1502, 1396, 1308, 1137, 1095, 816, 755  $\text{cm}^{-1}$ ,  $^1\text{H}$  NMR (400 MHz,  $\text{CDCl}_3$ )  $\delta$  7.73 (s, 2H), 7.56 – 7.51 (m, 2H), 7.49 – 7.43 (m, 5H), 7.23-7.21 (m, 1H), 7.13-7.09 (m, 3H), 7.07 – 7.03 (m, 2H), 6.98 – 6.94 (m, 2H), 6.76 (s, 1H), 6.72 (s, 1H) ppm,  $^{13}\text{C}$  NMR (100 MHz,  $\text{CDCl}_3$ )  $\delta$  169.85, 152.09, 149.42, 140.33, 138.37, 137.56, 137.31, 136.04, 133.53 (q,  $J=34.47$  Hz), 131.32, 129.61, 129.49, 128.96, 128.86, 128.53, 128.11, 128.02, 127.45, 125.62, 125.59, 122.36, 122.08 (d,  $J=273.62$  Hz), 113.70, 101.79 ppm, ESI-MS:  $m/z$  587  $[\text{M}+\text{H}]^+$ , HRMS (ESI) Anal. calcd. for  $\text{C}_{32}\text{H}_{20}\text{Cl}_2\text{F}_3\text{N}_4$   $m/z$  587.1011  $[\text{M}+\text{H}]^+$ , found 587.1022.



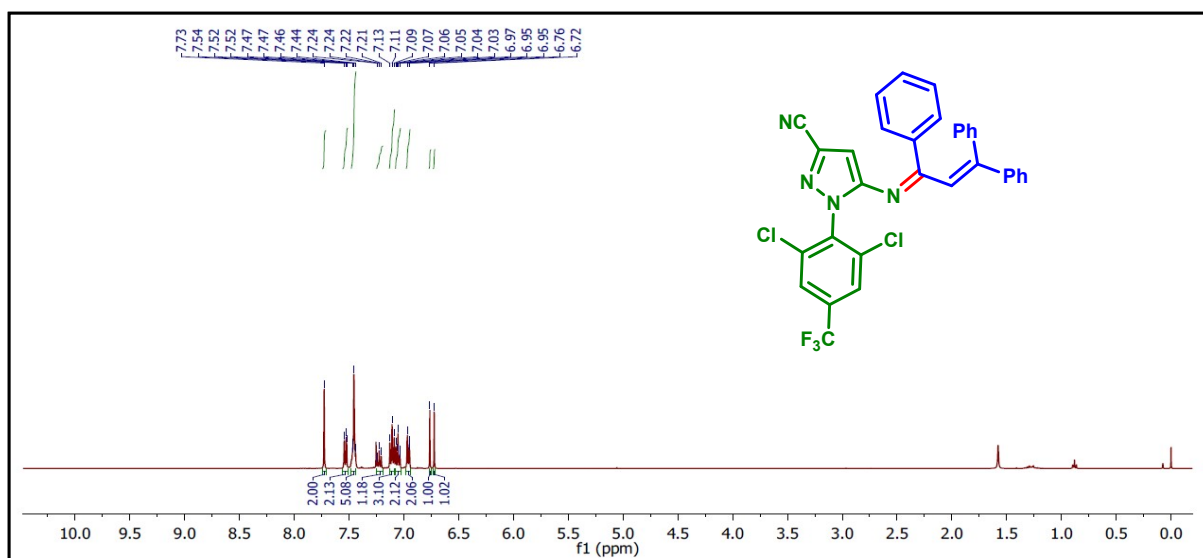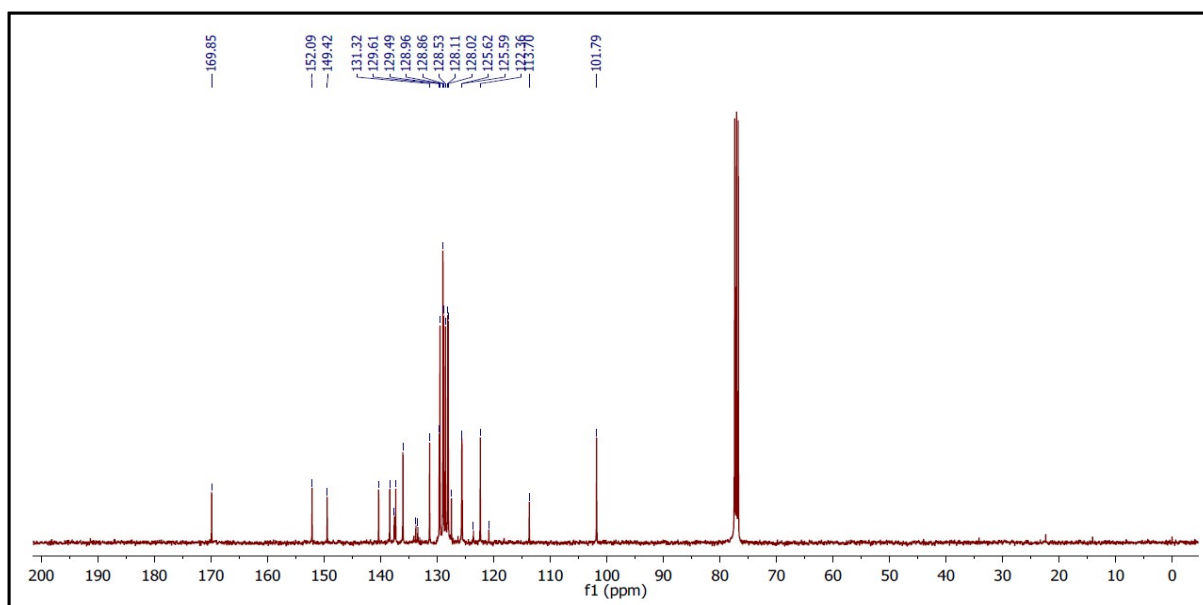

**(Z)-1-(2,6-dichloro-4-(trifluoromethyl)phenyl)-5-((3,3-diphenyl-1-(*p*-tolyl)allylidene)amino)-1*H*-pyrazole-3-carbonitrile (6ab)**

Isolated as a yellow solid, yield 92% (371 mg), m.p 246-248 °C, IR (ATR): 3060, 3023, 2244, 1557, 1503, 1397, 1306, 1175, 1137, 1094, 880, 819, 753 cm<sup>-1</sup>, <sup>1</sup>H NMR (500 MHz, CDCl<sub>3</sub>) δ 7.71 (s, 2H), 7.48 – 7.42 (m, 7H), 7.14 – 7.10 (m, 1H), 7.09 – 7.05 (m, 2H), 6.97-6.95 (m, 2H), 6.92 (d, *J* = 8.2 Hz, 2H), 6.74 (s, 1H), 6.69 (s, 1H), 2.23 (s, 3H) ppm, <sup>13</sup>C NMR (100 MHz, CDCl<sub>3</sub>) δ 169.51, 151.42, 149.49, 142.08, 140.46, 138.39, 137.63, 136.06, 134.57, 133.43 (q, *J*=34.11 Hz), 129.49, 129.41, 128.96, 128.86, 128.49, 128.11, 127.40, 125.57, 125.53, 122.45, 122.10 (d, *J*=273.26 Hz), 113.78, 101.65, 21.46 ppm, ESI-MS: *m/z* 601

[M+H]<sup>+</sup>, HRMS (ESI) Anal. calcd. for C<sub>33</sub>H<sub>22</sub>Cl<sub>2</sub>F<sub>3</sub>N<sub>4</sub> m/z 601.1168 [M+H]<sup>+</sup>, found 601.1143.

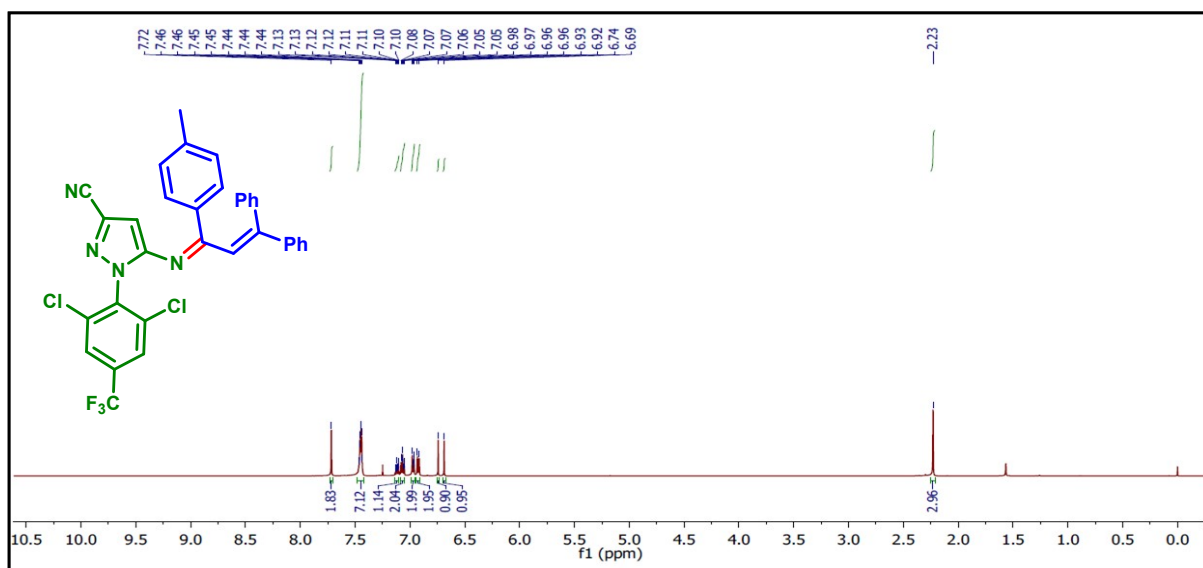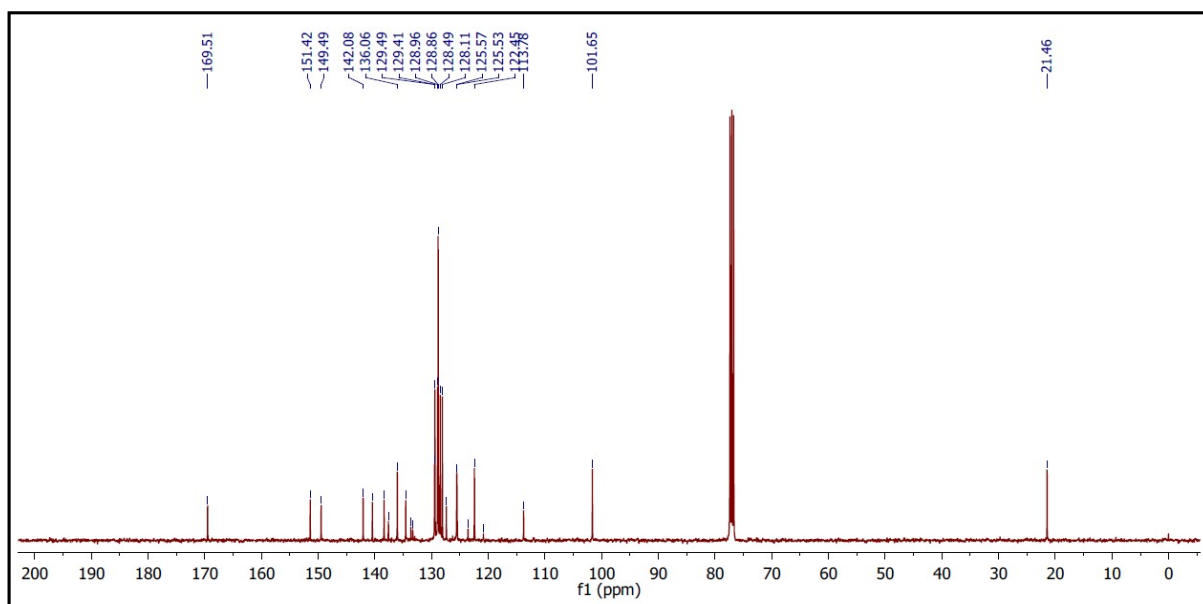

### 5-amino-1-(2,6-dichloro-4-(trifluoromethyl)phenyl)-4-(1,3-diphenylprop-2-yn-1-yl)-1H-pyrazole-3-carbonitrile (6a)

Isolated as a yellow solid, yield 80% (393 mg), m.p 189-191 °C, IR (ATR): 3339, 3073, 2241, 1623, 1572, 1492, 1388, 1315, 1142, 818, 755 cm<sup>-1</sup>, <sup>1</sup>H NMR (400 MHz, CDCl<sub>3</sub>) δ 7.77 (d, *J* = 3.1 Hz, 2H), 7.52 (d, *J* = 7.5 Hz, 2H), 7.50 – 7.46 (m, 2H), 7.42-7.38 (m, 2H), 7.35 – 7.30 (m, 4H), 5.37 (s, 1H), 3.95 (s, 2H) ppm, <sup>13</sup>C NMR (100 MHz, CDCl<sub>3</sub>) δ 144.44, 138.87, 136.56, 135.53, 134.49 (q, *J* = 34.47 Hz), 131.77, 129.08, 128.70, 128.47, 127.74, 127.21,

127.10, 126.21, 122.37, 121.62 (d,  $J = 273.62$  Hz), 112.90, 106.74, 86.61, 85.17, 32.95 ppm, ESI-MS:  $m/z$  511  $[M+H]^+$ , HRMS (ESI) Anal. calcd. for  $C_{26}H_{16}Cl_2F_3N_4$   $m/z$  511.0698  $[M+H]^+$ , found 511.0682.

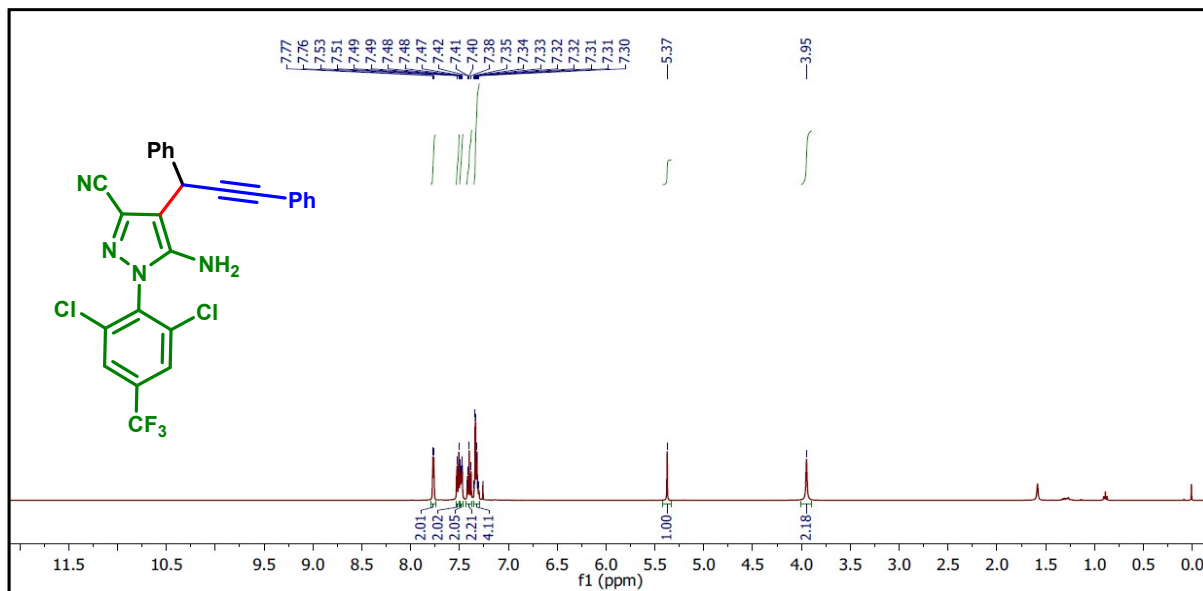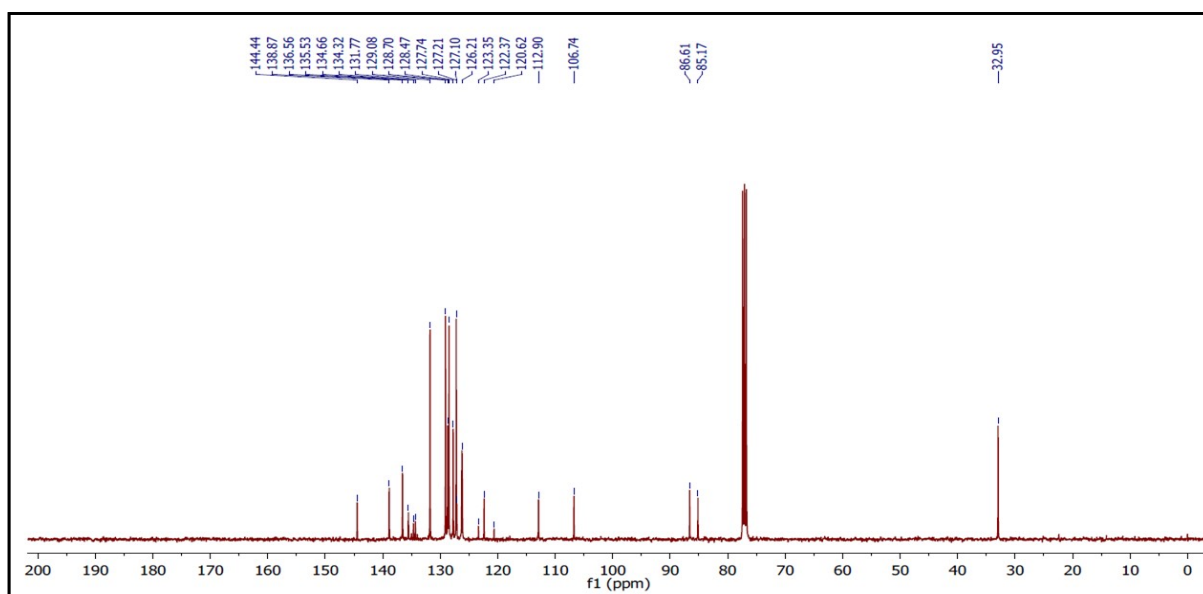

**5-amino-1-(2,6-dichloro-4-(trifluoromethyl)phenyl)-4-(1-(4-fluorophenyl)-3-phenylprop-2-yn-1-yl)-1H-pyrazole-3-carbonitrile (6b)**

Isolated as a yellow solid, yield 89% (416 mg), m.p 203-205 °C, IR (ATR): 3339, 3078, 2241, 1624, 1620, 1506, 1387, 1317, 1175, 1143, 816, 757  $cm^{-1}$ ,  $^1H$  NMR (500 MHz,  $CDCl_3$ )  $\delta$  7.77 (d,  $J = 2.8$  Hz, 2H), 7.49-7.46 (m, 4H), 7.36 – 7.31 (m, 3H), 7.10 – 7.06 (m, 2H), 5.35 (s, 1H), 3.98 (s, 2H) ppm,  $^{13}C$  NMR (100 MHz,  $CDCl_3$ )  $\delta$  163.43, 160.98, 144.36, 136.53,

135.42, 134.49 (q,  $J = 34.84$  Hz), 131.75, 128.85, 128.79, 128.52, 126.99, 126.24, 122.13, 121.62 (d,  $J = 273.99$  Hz), 116.05, 115.84, 112.81, 106.46, 86.34, 85.36, 32.29 ppm, ESI-MS:  $m/z$  529  $[M+H]^+$ , HRMS (ESI) Anal. calcd. for  $C_{26}H_{15}Cl_2F_4N_4$   $m/z$  529.0604  $[M+H]^+$ , found 529.0588.

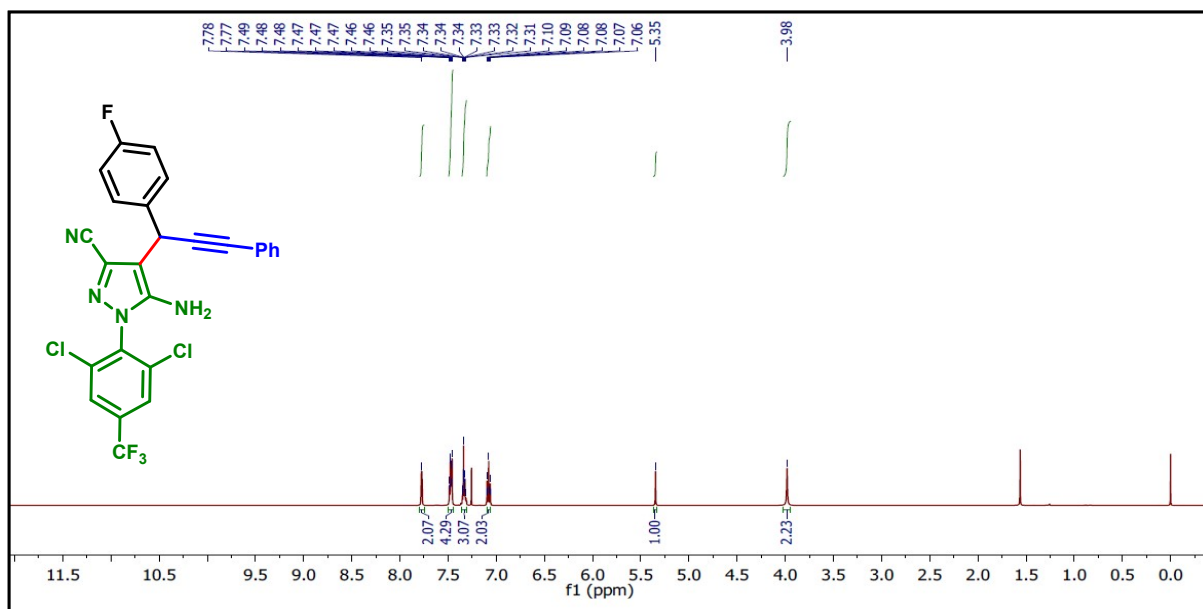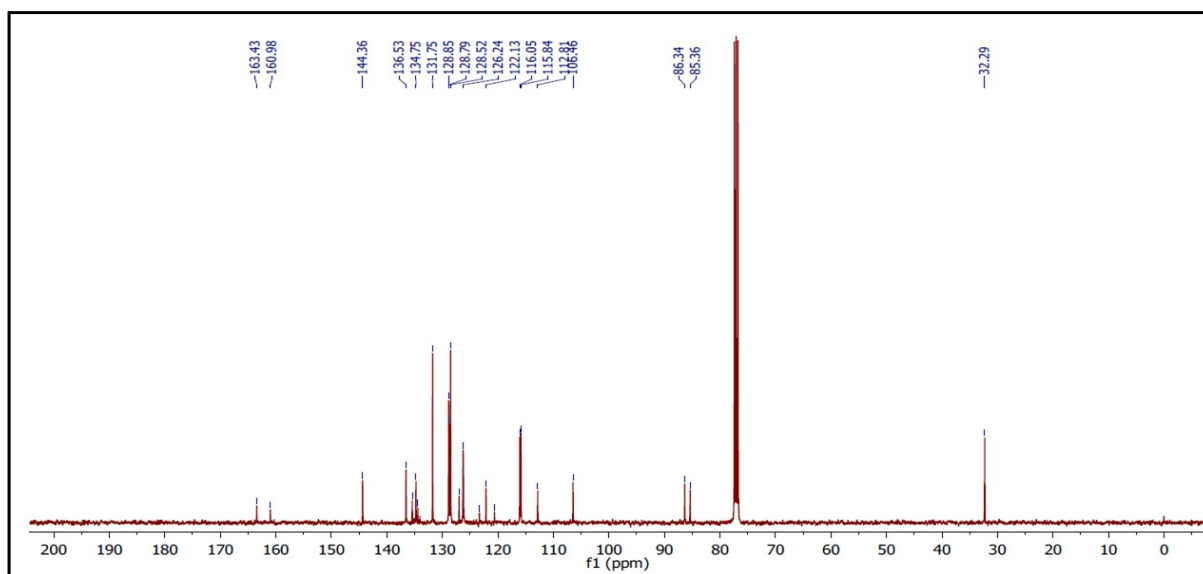

### 1-(2,6-dichloro-4-(trifluoromethyl)phenyl)-4,6-diphenyl-1*H*-pyrazolo[3,4-*b*]pyridine-3-carbonitrile (7a)

Isolated as a cream solid, yield 93% (455 mg), m.p 149-151 °C, IR (ATR): 3066, 2241, 1567, 1317, 1179, 1142, 878, 758  $cm^{-1}$ ,  $^1H$  NMR (400 MHz,  $CDCl_3$ )  $\delta$  8.07 – 8.02 (m, 2H), 7.86 (d,  $J = 4.1$  Hz, 3H), 7.78 (m, 2H), 7.67 – 7.60 (m, 3H), 7.50 – 7.46 (m, 3H) ppm,  $^{13}C$  NMR (125

MHz, CDCl<sub>3</sub>) δ 159.76, 151.86, 145.94, 137.83, 136.47, 136.19, 134.94, 134.09 (d, *J* = 34.3 Hz), 130.48, 130.35, 129.27, 129.03, 128.99, 127.90, 126.13, 126.10, 122.25 (q, *J* = 273.6 Hz), 120.79, 118.08, 112.97, 112.83 ppm, ESI-MS: *m/z* 509 [M+H]<sup>+</sup>, HRMS (ESI) Anal. calcd. for C<sub>26</sub>H<sub>14</sub>Cl<sub>2</sub>F<sub>3</sub>N<sub>4</sub> *m/z* 509.0542 [M+H]<sup>+</sup>, found 509.0524.

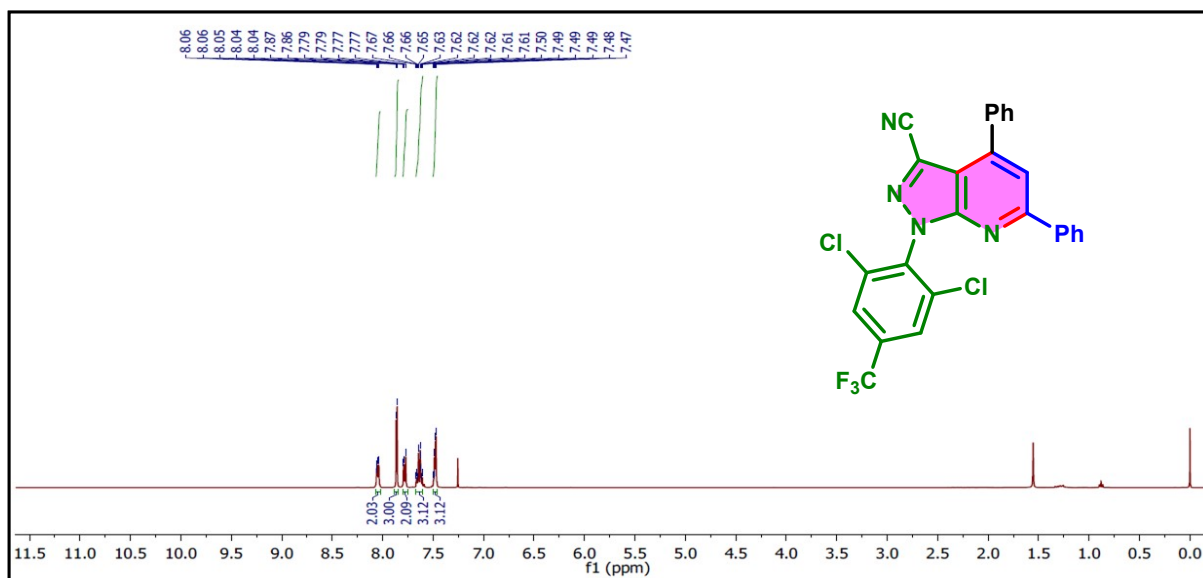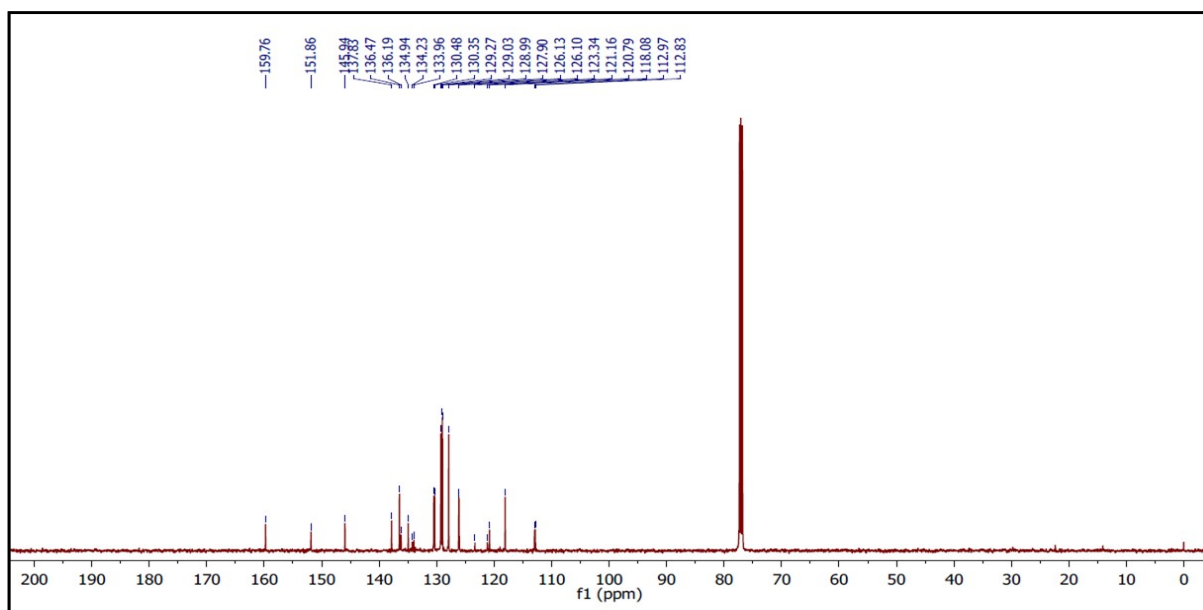

**1-(2,6-dichloro-4-(trifluoromethyl)phenyl)-4-(4-fluorophenyl)-6-phenyl-1H-pyrazolo[3,4-*b*]pyridine-3-carbonitrile (7b)**

Isolated as a colourless solid, yield 90% (419 mg), m.p 158-160 °C, IR (ATR): 3052, 2241, 1528, 1372, 1305, 1205, 1123, 806, 772 cm<sup>-1</sup>, <sup>1</sup>H NMR (500 MHz, CDCl<sub>3</sub>) δ 8.06 – 8.03 (m, 2H), 7.86 (s, 2H), 7.83 (s, 1H), 7.79 – 7.75 (m, 2H), 7.50 – 7.47 (m, 3H), 7.36 – 7.32 (m, 2H) ppm, <sup>13</sup>C NMR (100 MHz, CDCl<sub>3</sub>) δ 164.09 (d, *J* = 251.0 Hz), 159.84, 151.85, 144.78,

137.70, 136.44, 136.11, 134.15 (d,  $J = 34.6$  Hz), 131.23, 131.15, 130.57, 129.01, 127.89, 126.14, 126.11, 122.23 (q,  $J = 273.8$  Hz), 120.59, 118.03, 116.39, 116.17, 112.92, 112.81 ppm, ESI-MS:  $m/z$  527  $[M+H]^+$ , HRMS (ESI) Anal. calcd. for  $C_{26}H_{13}Cl_2F_4N_4$   $m/z$  527.0447  $[M+H]^+$ , found 527.0427.

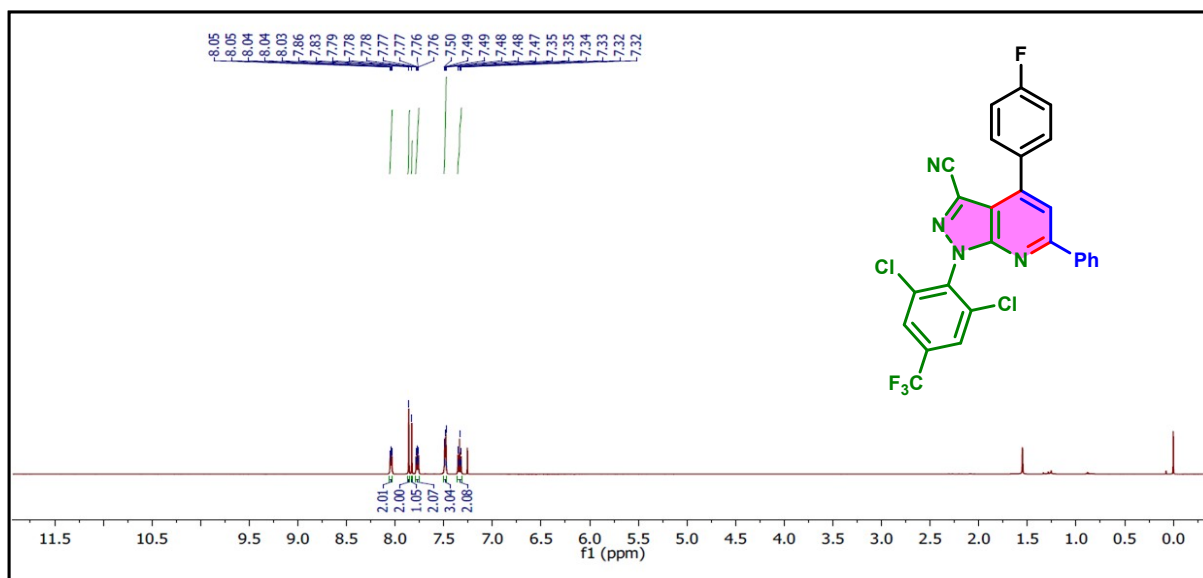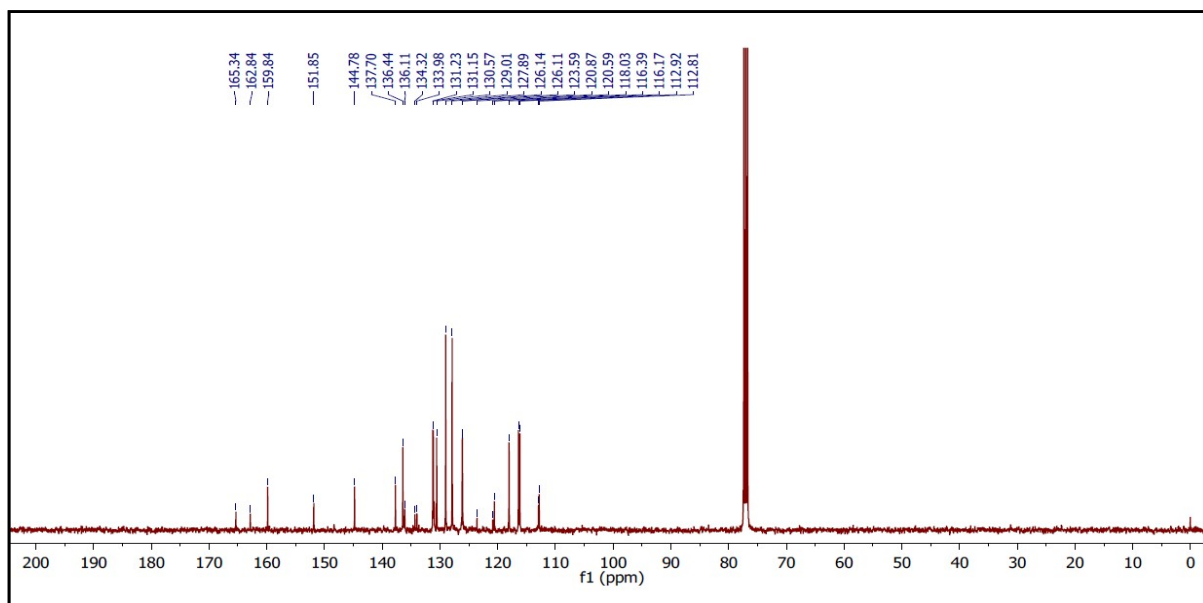

### 3-methyl-1,4,6-triphenyl-1H-pyrazolo[3,4-b]pyridine (7c)

Isolated as a light yellow solid, yield 92% (319 mg), m.p 190-192 °C, IR (ATR): 3023, 2873, 1689, 1657, 1492, 1385, 1218, 1147, 871, 752  $cm^{-1}$ ,  $^1H$  NMR (400 MHz,  $CDCl_3$ )  $\delta$  8.43 (d,  $J = 7.7$  Hz, 2H), 8.22 – 8.14 (m, 2H), 7.56 – 7.47 (m, 10H), 7.46-7.44 (m, 1H), 7.28 (t,  $J = 7.4$  Hz, 1H), 2.30 (s, 3H) ppm,  $^{13}C$  NMR (100 MHz,  $CDCl_3$ )  $\delta$  156.49, 151.68, 146.63, 142.53,

139.84, 139.19, 137.88, 129.50, 129.10, 129.02, 128.84, 128.78, 128.40, 127.64, 125.39, 121.00, 115.37, 113.84, 15.46 ppm, ESI-MS:  $m/z$  362  $[M+H]^+$ , HRMS (ESI) Anal. calcd. for  $C_{25}H_{20}N_3$   $m/z$  362.1651  $[M+H]^+$ , found 362.1646.

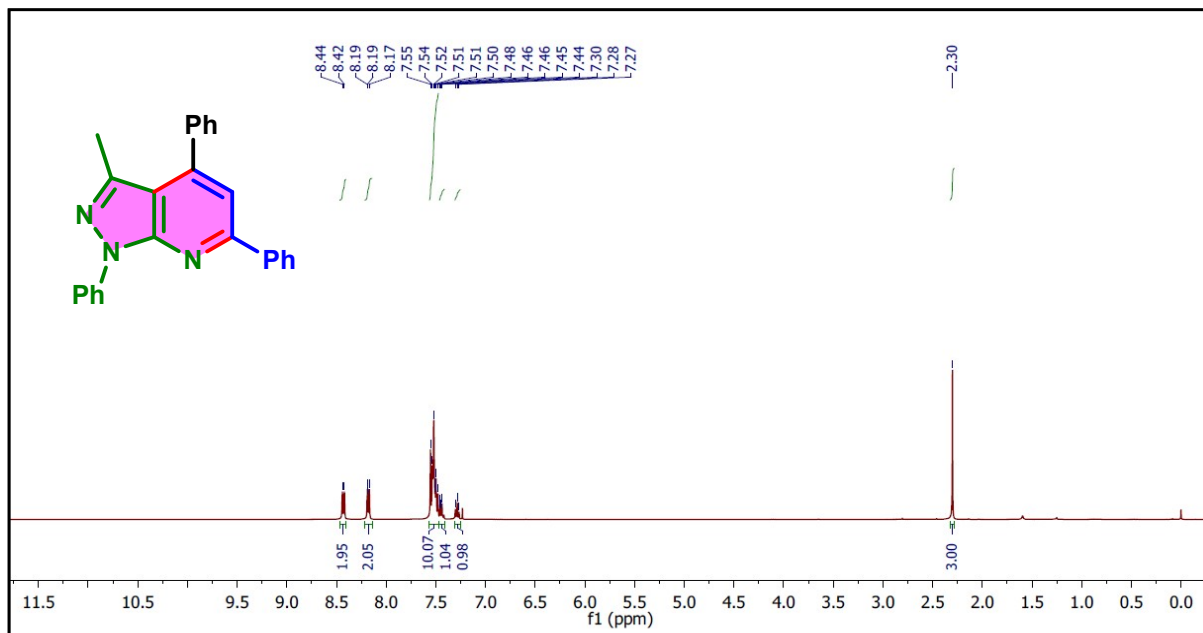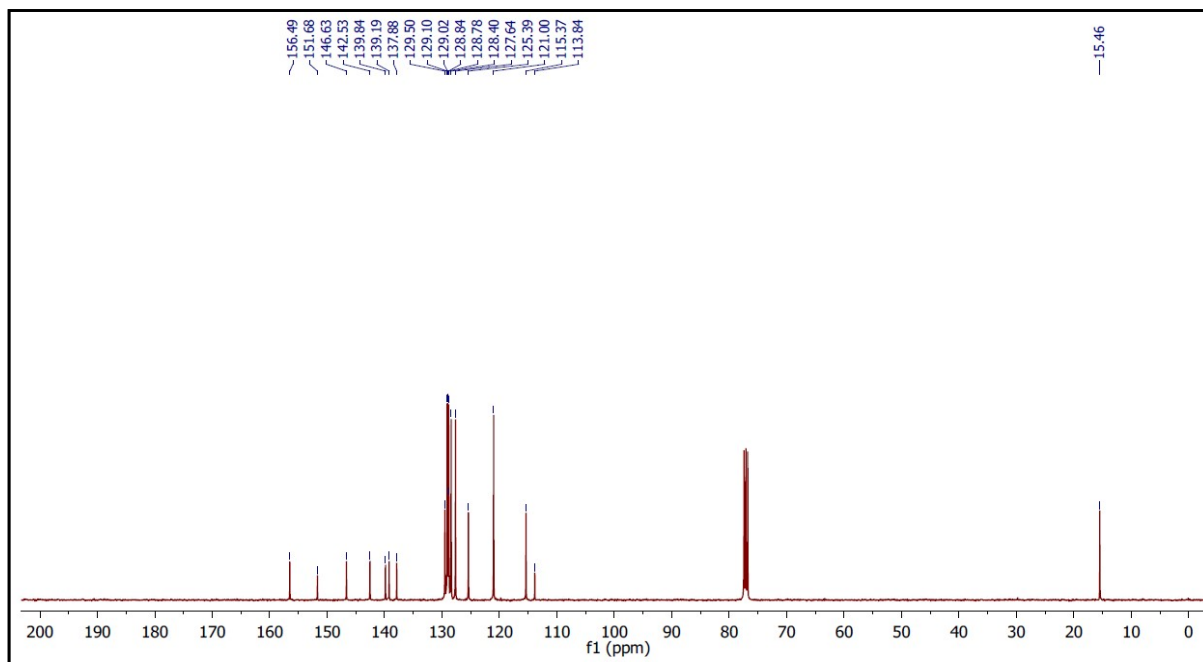

#### 4-(4-chlorophenyl)-3-methyl-1,6-diphenyl-1*H*-pyrazolo[3,4-*b*]pyridine (7d)

Isolated as a colourless solid, yield 87% (284 mg), m.p 212-214 °C, IR (ATR): 3032, 2912, 1652, 1625, 1523, 1402, 1283, 1123, 932, 782 cm<sup>-1</sup>, <sup>1</sup>H NMR (400 MHz, CDCl<sub>3</sub>) δ 8.40 (m, 2H), 8.13 (d, *J* = 8.6 Hz, 2H), 7.58 – 7.51 (m, 8H), 7.50 – 7.45 (m, 2H), 7.31 (t, *J* = 7.4 Hz, 1H), 2.31 (s, 3H) ppm, <sup>13</sup>C NMR (100 MHz, CDCl<sub>3</sub>) δ 155.18, 151.54, 146.85, 142.59, 139.69, 137.68, 137.61, 135.64, 129.03, 128.85, 128.43, 125.52, 121.04, 115.03, 113.95, 15.41 ppm, ESI-MS: *m/z* 396 [M+H]<sup>+</sup>, HRMS (ESI) Anal. calcd. for C<sub>25</sub>H<sub>19</sub>ClN<sub>3</sub> *m/z* 396.1262 [M+H]<sup>+</sup>, found 396.1252.

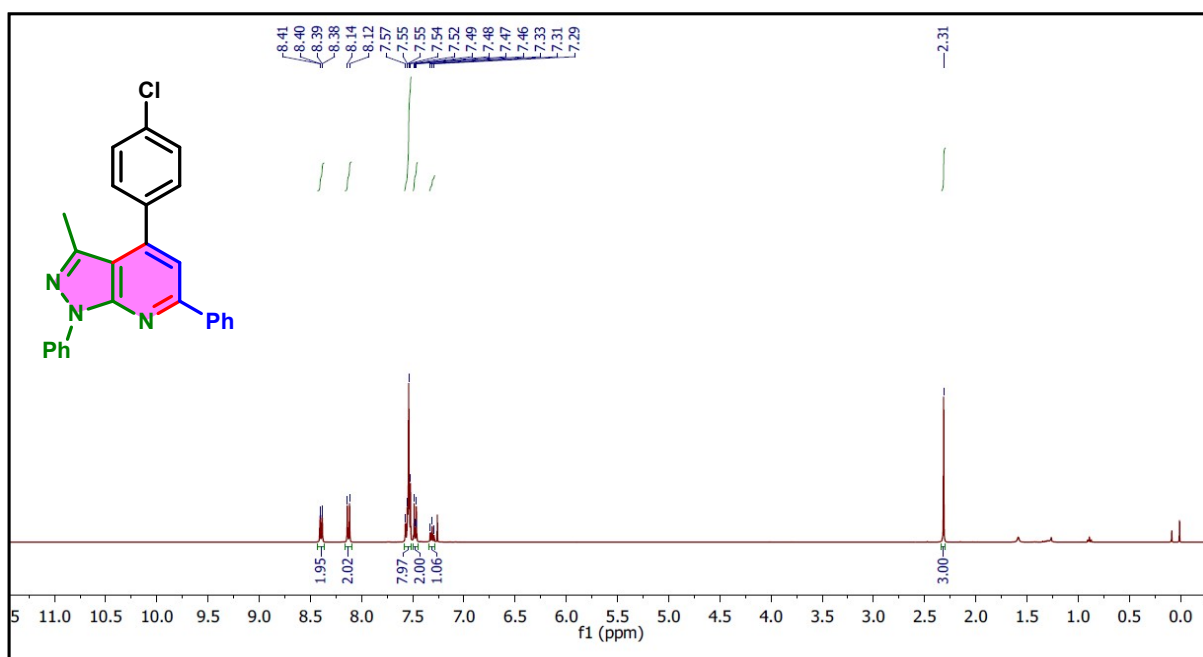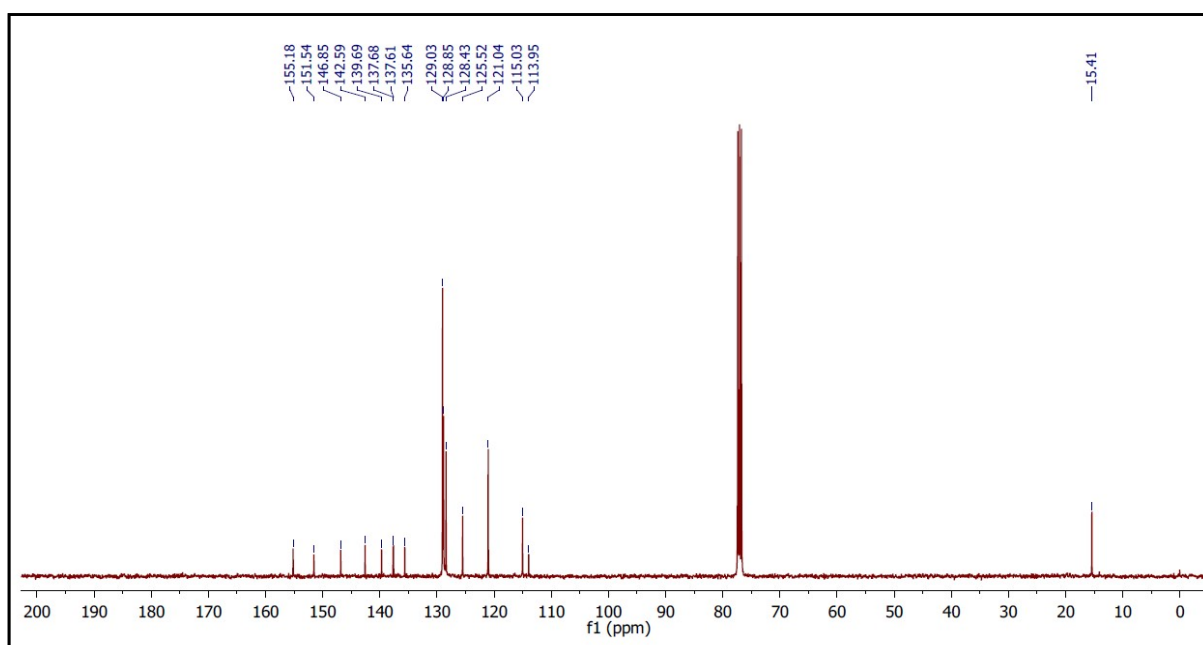



### 1,4,6-triphenyl-1*H*-pyrazolo[3,4-*b*]pyridine-3-carbonitrile (7e)

Isolated as a brown solid, yield 85% (304 mg), m.p 207-209 °C, IR (ATR): 3058, 3027, 2924, 1954, 1602, 1548, 1493, 1447, 1236, 1176, 915, 756, 698 cm<sup>-1</sup>, <sup>1</sup>H NMR (400 MHz, CDCl<sub>3</sub>) δ 8.40 (d, *J* = 7.8 Hz, 2H), 8.19 (d, *J* = 6.5 Hz, 2H), 7.86 (s, 1H), 7.74 (d, *J* = 6.4 Hz, 2H), 7.65-7.59 (m, 5H), 7.53 (t, *J* = 7.4 Hz, 3H), 7.46 (t, *J* = 7.4 Hz, 1H) ppm, <sup>13</sup>C NMR (100 MHz, CDCl<sub>3</sub>) δ 158.53, 150.71, 145.61, 138.64, 138.10, 135.19, 130.33, 130.16, 129.29, 129.23, 129.06, 128.94, 127.76, 122.20, 118.29, 117.47, 114.58, 113.46 ppm, ESI-MS: *m/z* 373 [M+H]<sup>+</sup>, HRMS (ESI) Anal. calcd. for C<sub>25</sub>H<sub>17</sub>N<sub>4</sub> *m/z* 373.1447 [M+H]<sup>+</sup>, found 373.1439.

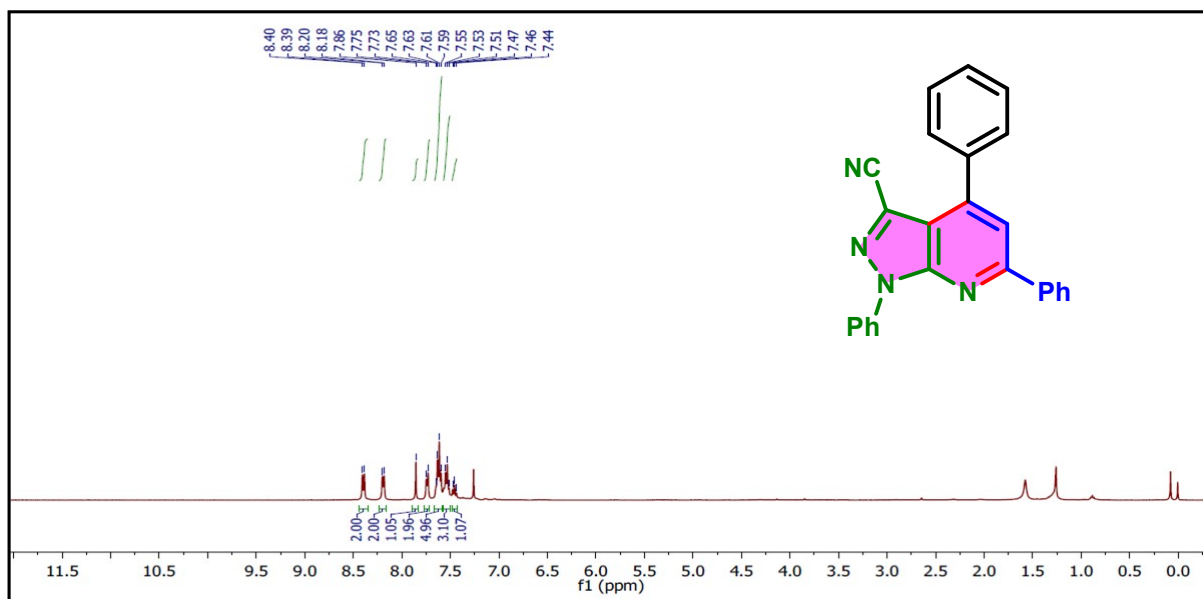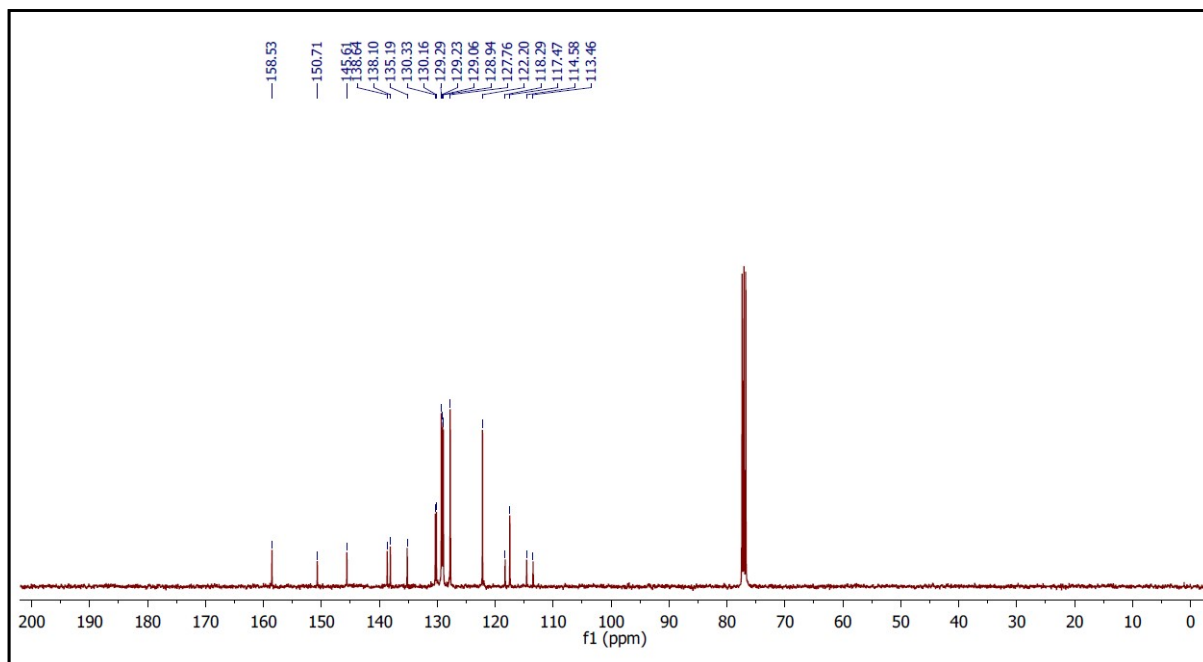

### 1,3,4,6-tetraphenyl-1*H*-pyrazolo[3,4-*b*]pyridine (7f)

Isolated as a light yellow solid, yield 82% (333 mg), m.p 206-208 °C, IR (ATR): 3227, 3055, 2957, 2869, 1635, 1589, 1483, 1272, 1157, 926, 756 cm<sup>-1</sup>, <sup>1</sup>H NMR (400 MHz, CDCl<sub>3</sub>) δ 8.53 (d, *J* = 7.8 Hz, 2H), 8.23 (d, *J* = 7.2 Hz, 2H), 7.70 (s, 1H), 7.70-7.45 (m, 5H), 7.36 – 7.16 (m, 9H), 7.11 (t, *J* = 7.5 Hz, 2H) ppm, <sup>13</sup>C NMR (100 MHz, CDCl<sub>3</sub>) δ 156.72, 152.03, 146.65, 145.92, 139.81, 139.12, 137.50, 133.02, 129.61, 129.37, 129.28, 129.04, 128.90, 128.44, 128.05, 127.84, 127.69, 127.64, 125.87, 121.56, 116.08, 112.22 ppm, ESI-MS: *m/z* 424 [M+H]<sup>+</sup>, HRMS (ESI) Anal. calcd. for C<sub>30</sub>H<sub>22</sub>N<sub>3</sub> *m/z* 424.1808 [M+H]<sup>+</sup>, found 424.1801.

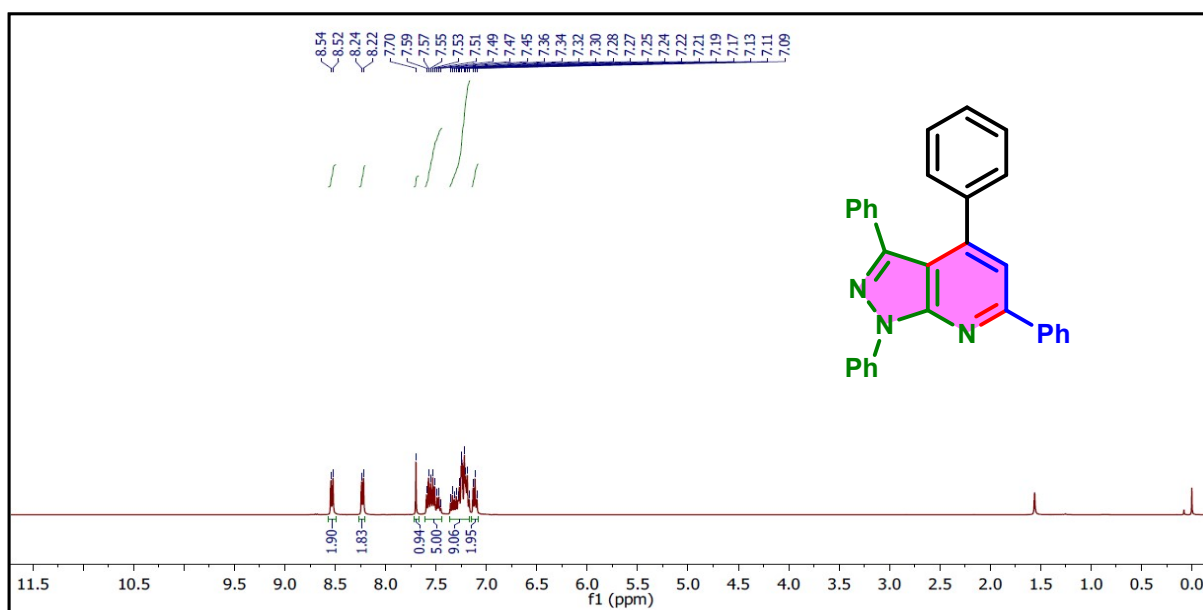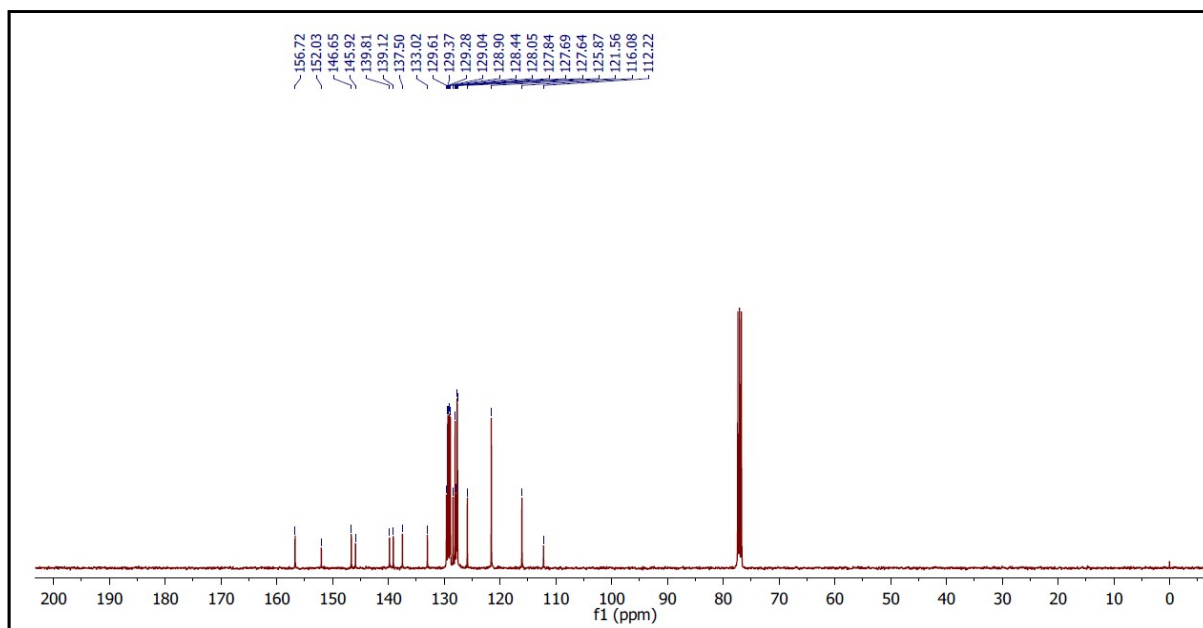

### 3-methyl-4,6-diphenyl-1H-pyrazolo[3,4-b]pyridine (7g)

Isolated as a light yellow solid, yield 36% (98 mg), m.p 198-200 °C, IR (ATR): 3107, 3023, 2932, 2035, 1683, 1567, 1438, 1302, 1232, 976, 857  $\text{cm}^{-1}$ ,  $^1\text{H}$  NMR (400 MHz,  $\text{CDCl}_3$ )  $\delta$  12.17 (br (NH), 1H), 8.20 – 8.12 (m, 2H), 7.58 – 7.43 (m, 9H), 2.31 (s, 3H) ppm,  $^{13}\text{C}$  NMR (100 MHz,  $\text{CDCl}_3$ )  $\delta$  157.03, 153.76, 146.74, 142.40, 139.29, 138.01, 129.42, 129.09, 128.94, 128.74, 128.38, 127.76, 115.26, 111.78, 15.55 ppm, ESI-MS:  $m/z$  286  $[\text{M}+\text{H}]^+$ , HRMS (ESI) Anal. calcd. for  $\text{C}_{19}\text{H}_{16}\text{N}_3$   $m/z$  286.1338  $[\text{M}+\text{H}]^+$ , found 286.1335.

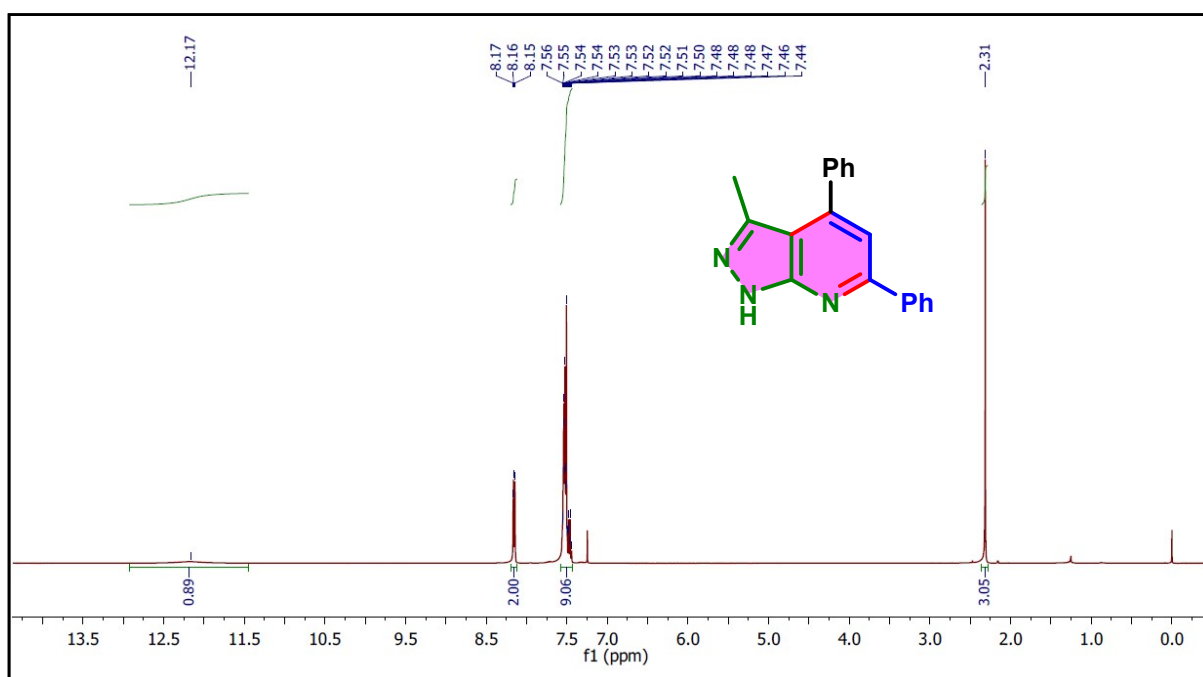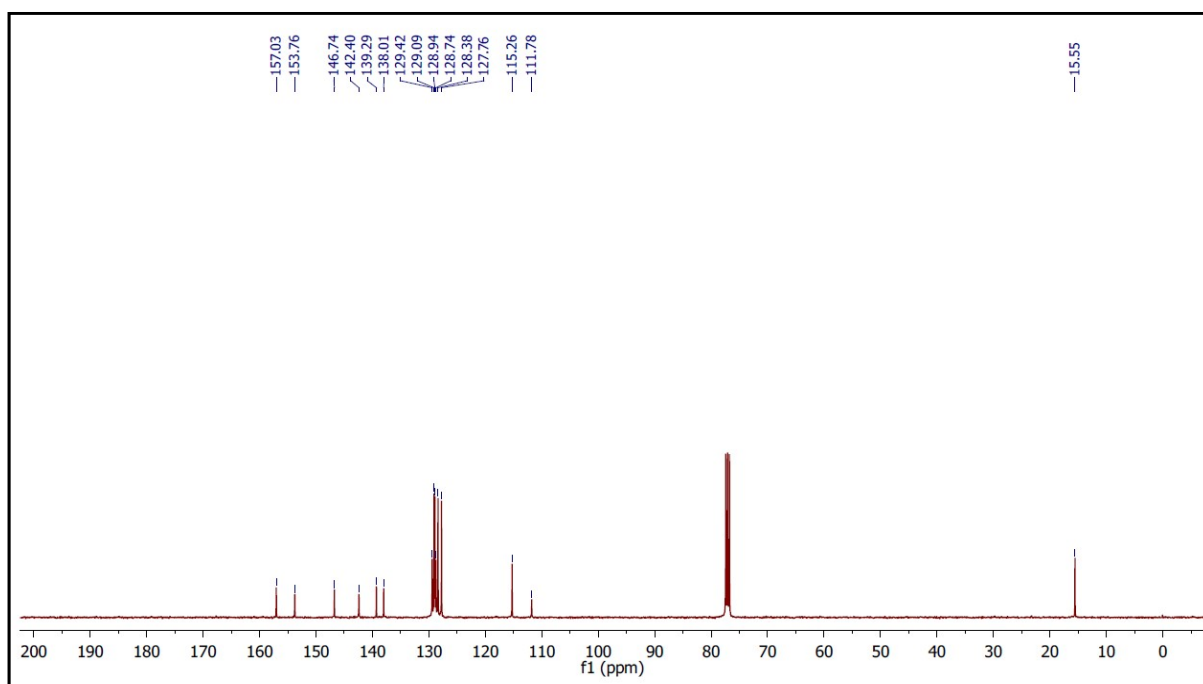

### 3-methyl-6-phenyl-4-(*p*-tolyl)-1*H*-pyrazolo[3,4-*b*]pyridine (7h)

Isolated as a light yellow solid, yield 42% (113 mg), m.p 185-187 °C, IR (ATR): 3135, 3005, 2952, 2011, 1632, 1522, 1467, 1295, 1202, 1023, 962, 878 cm<sup>-1</sup>, <sup>1</sup>H NMR (400 MHz, CDCl<sub>3</sub>) δ 8.04 (d, *J* = 7.2 Hz, 2H), 7.48 – 7.36 (m, 6H), 7.27 (d, *J* = 7.8 Hz, 2H), 7.18 (br (NH), 1H), 2.40 (s, 3H), 2.25 (s, 3H) ppm, <sup>13</sup>C NMR (125 MHz, CDCl<sub>3</sub>) δ 156.45, 152.89, 147.60, 142.90, 139.02, 138.59, 134.75, 129.69, 129.15, 128.99, 127.71, 115.37, 112.11, 21.40, 15.58 ppm, ESI-MS: *m/z* 300 [M+H]<sup>+</sup>, HRMS (ESI) Anal. calcd. for C<sub>20</sub>H<sub>18</sub>N<sub>3</sub> *m/z* 300.1491 [M+H]<sup>+</sup>, found 300.1495.

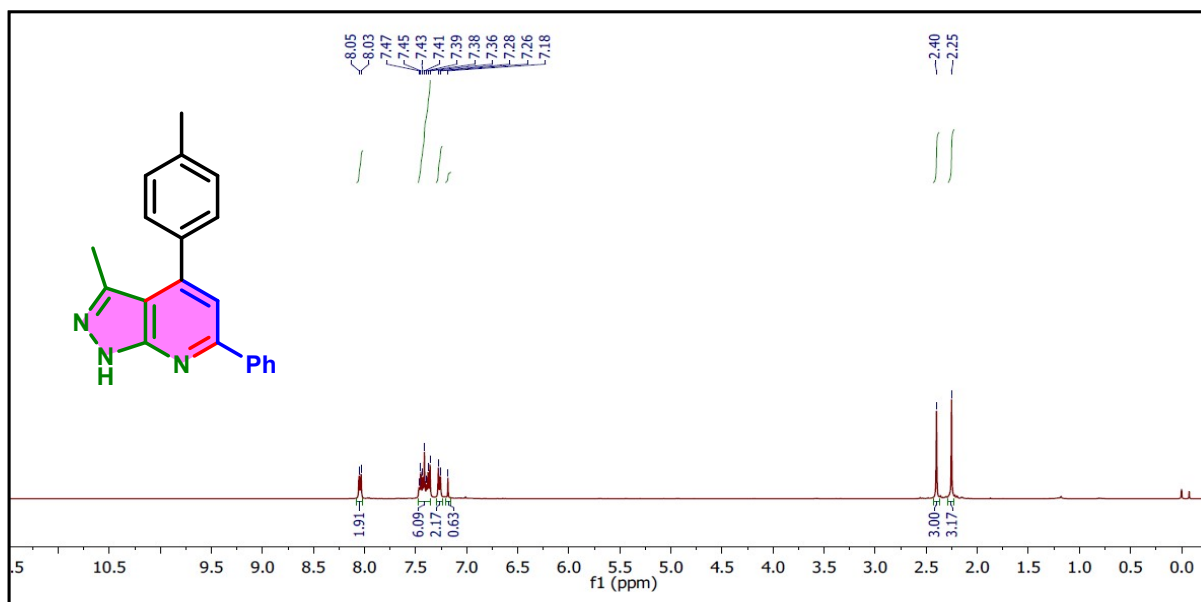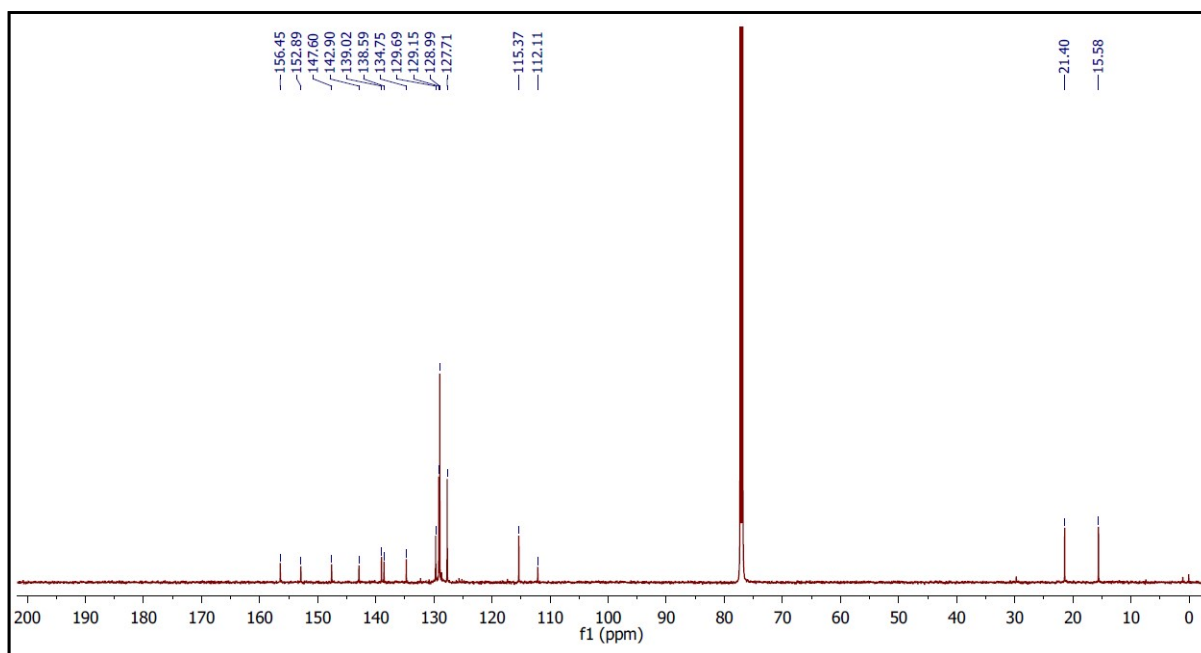

## 1,4,6-triphenyl-1*H*-pyrazolo[3,4-*b*]pyridine (7i)

Isolated as a white solid, yield 82% (273 mg), m.p 158-160 °C, IR (ATR): 3140, 3012, 2930, 2023, 1643, 1563, 1432, 1284, 1212, 1062, 973, 867 cm<sup>-1</sup>, <sup>1</sup>H NMR (400 MHz, CDCl<sub>3</sub>): δ 8.45 (d, *J* = 7.8 Hz, 2H), 8.31 (s, 1H), 8.20 (d, *J* = 7.1 Hz, 2H), 7.84 – 7.75 (m, 3H), 7.61 – 7.44 (m, 8H), 7.33 (t, *J* = 7.4 Hz, 1H) ppm, <sup>13</sup>C NMR (125 MHz, CDCl<sub>3</sub>): δ 157.27, 151.24, 144.80, 139.86, 139.30, 137.60, 133.48, 129.59, 129.49, 129.31, 129.09, 128.89, 128.50, 127.70, 125.92, 121.27, 114.64, 113.98 ppm, ESI-MS: *m/z* 348 [M+H]<sup>+</sup>, HRMS (ESI) Anal. calcd. for C<sub>24</sub>H<sub>17</sub>N<sub>3</sub> *m/z* 348.1506 [M+H]<sup>+</sup>, found 348.1485.

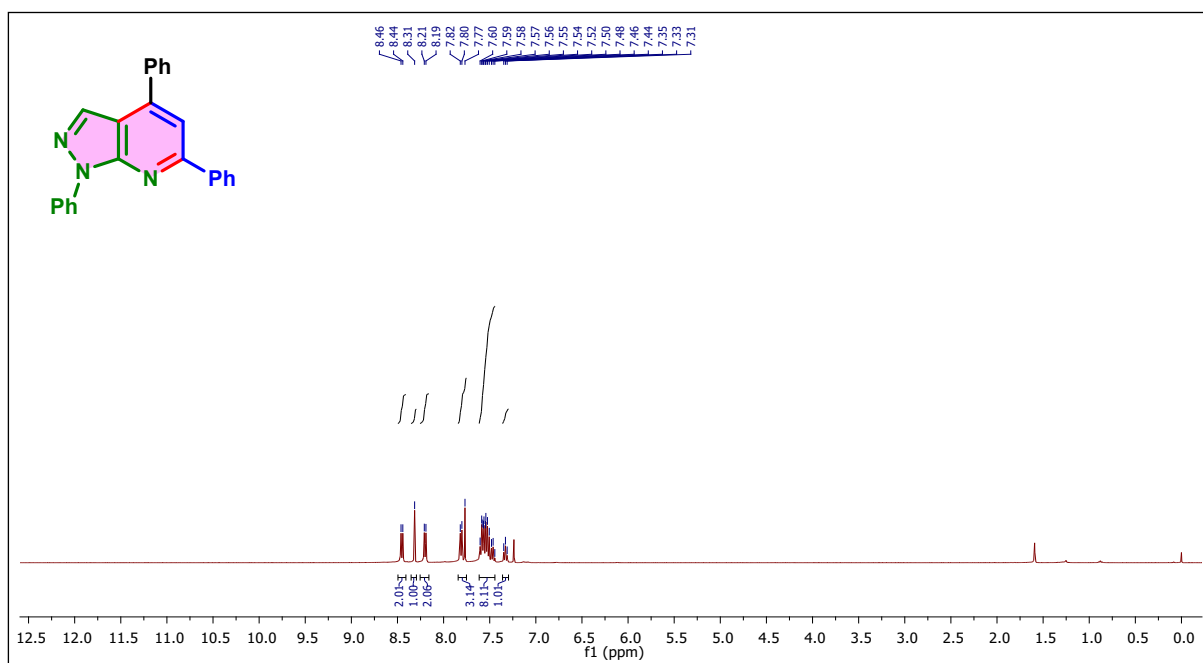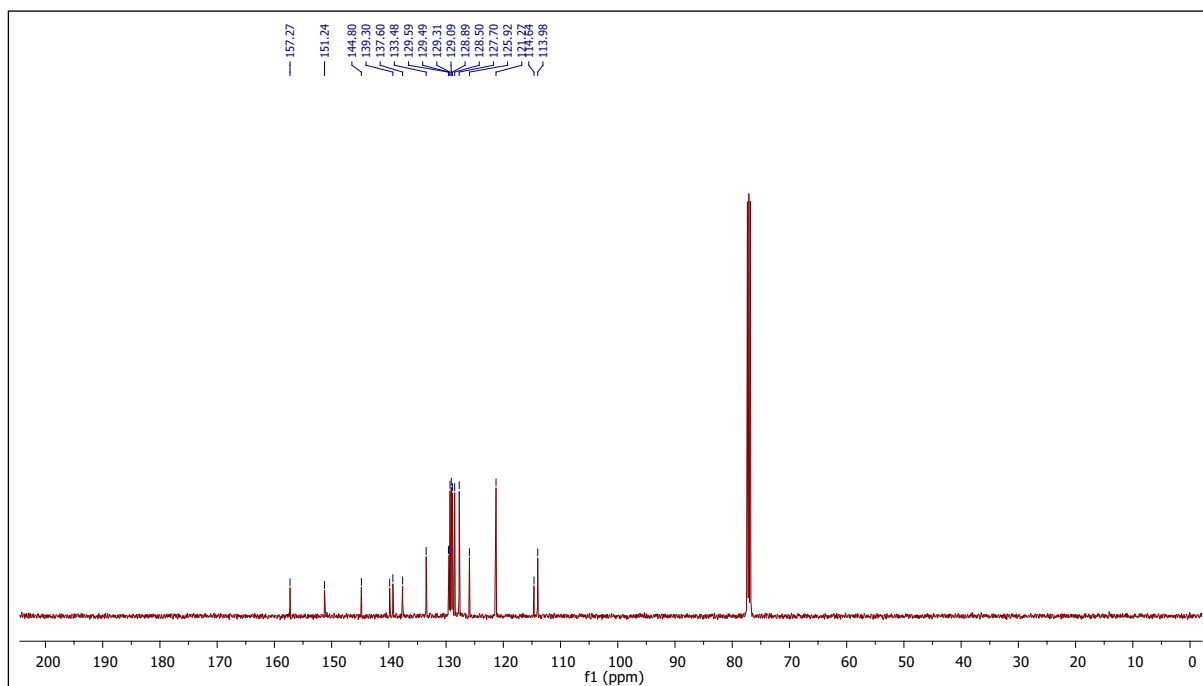

Supplement: d4ob01255k1.pdf [file d4ob01255k1.pdf]
